# Supplementary material for: Molecularly defined cellular atlas of the entire mouse brain with isotropic single-cell resolution
Source: Research Square preprint supplement (doi:10.21203/rs.3.rs-5909054/v1), 2025-03-06
Supplement: Supplementary file 1 [file bc6cd2bc793d6e49047953a0.pdf]

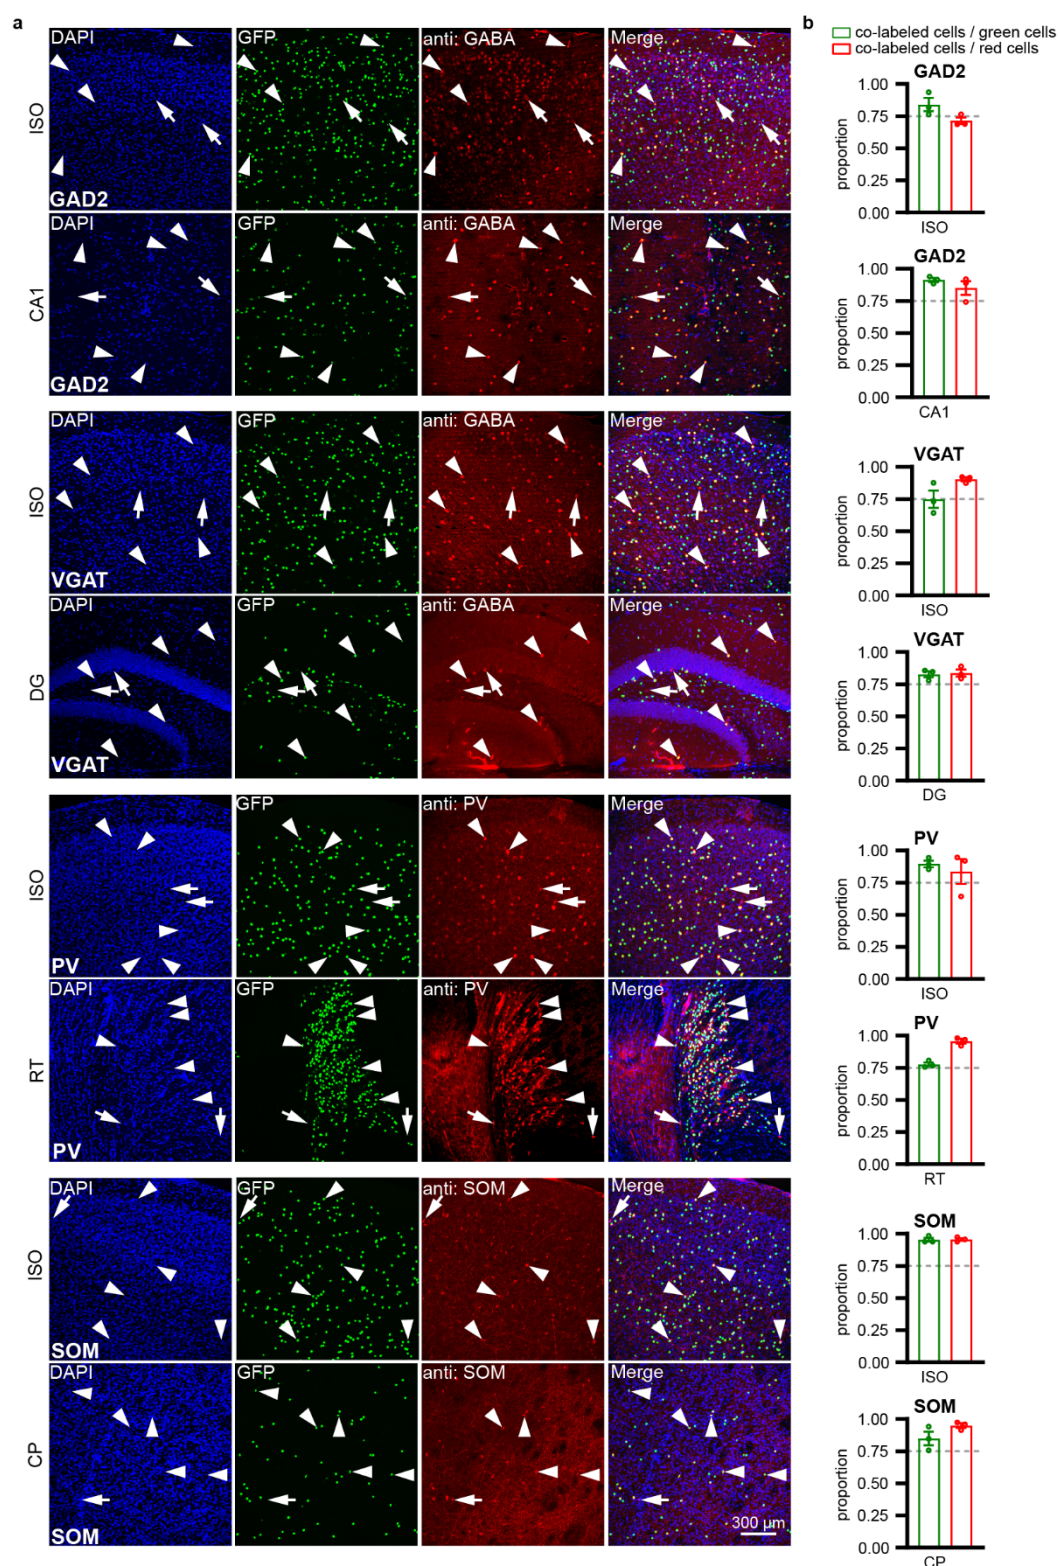

### Supplementary Fig. 1 | Immunohistochemical validation of four types of GABAergic neurons

(a) Representative images from two brain regions for each neuron type are shown. Arrows indicate cells that are co-labeled in both red and green channels, representing cells expressing both H2B-GFP and the corresponding antibody. Arrowheads indicate cells labeled only by the antibody without H2B-GFP expression. Scale bar, 300  $\mu$ m.

(b) Proportions of co-labeled cells relative to GFP-labeled cells (green) and antibody-labeled cells (red).

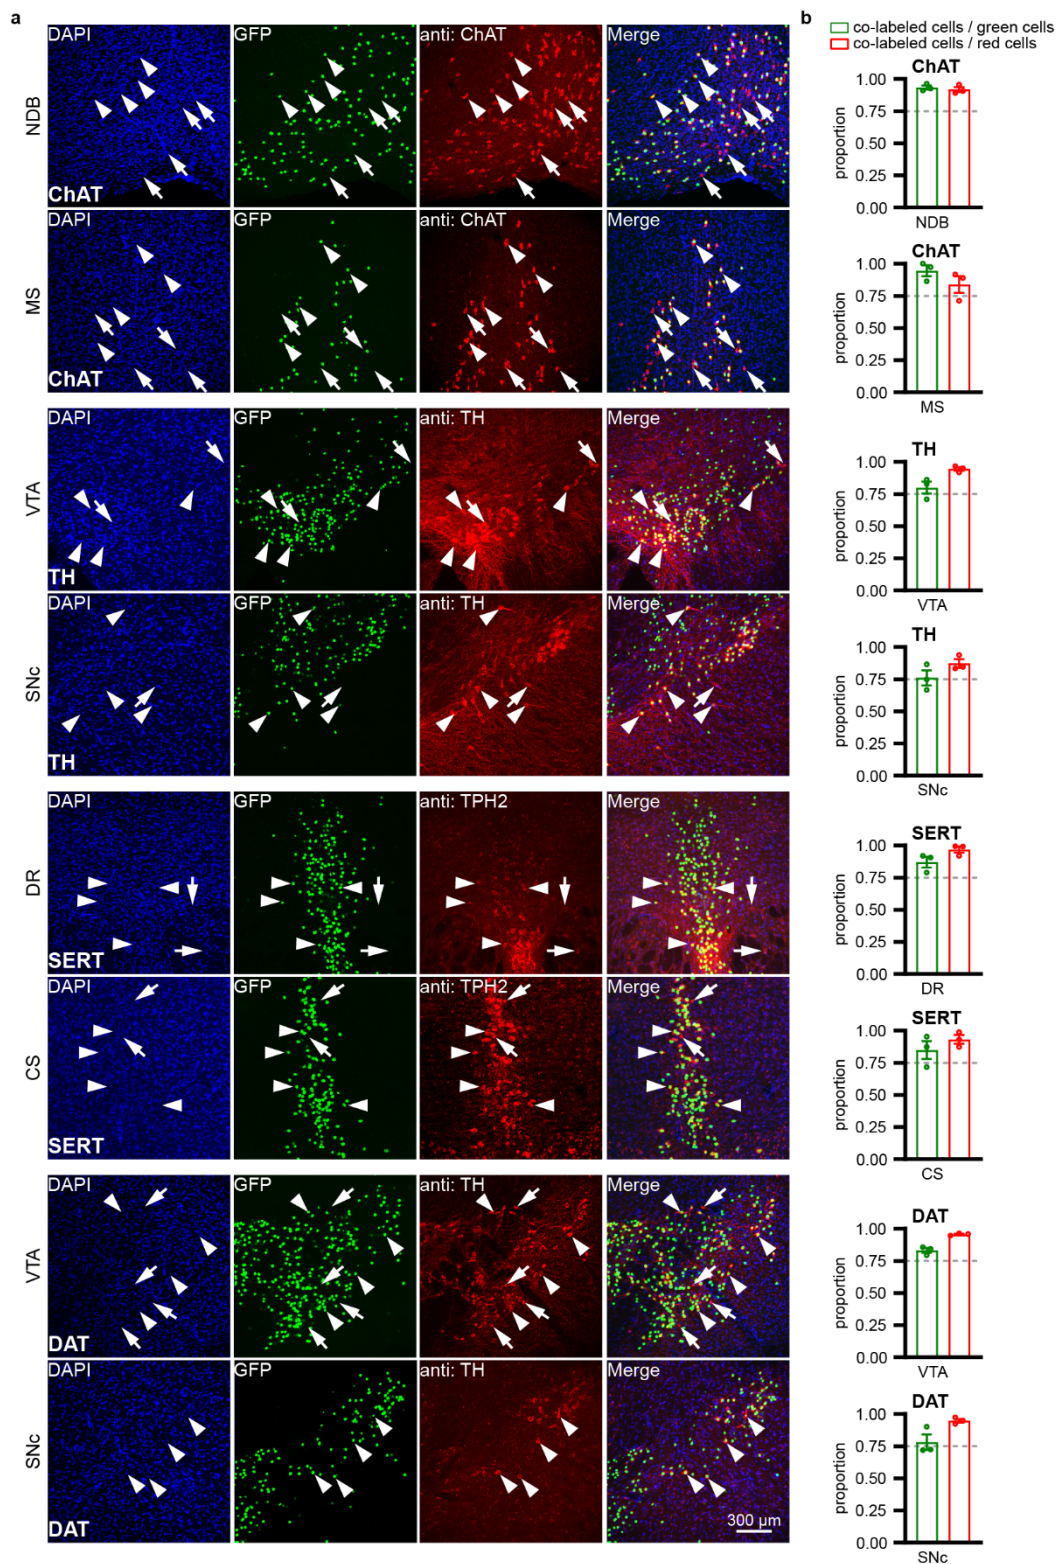

## Supplementary Fig. 2 | Immunohistochemical validation of four types of modulatory neurons

(a) Representative images from two brain regions for each neuron type are shown. Arrows indicate cells that are co-labeled in both red and green channels, representing cells expressing both H2B-GFP and the corresponding antibody. Arrowheads indicate cells labeled only by the antibody without H2B-GFP expression. Scale bar, 300  $\mu$ m.

(b) Proportions of co-labeled cells relative to GFP-labeled cells (green) and antibody-labeled cells (red).



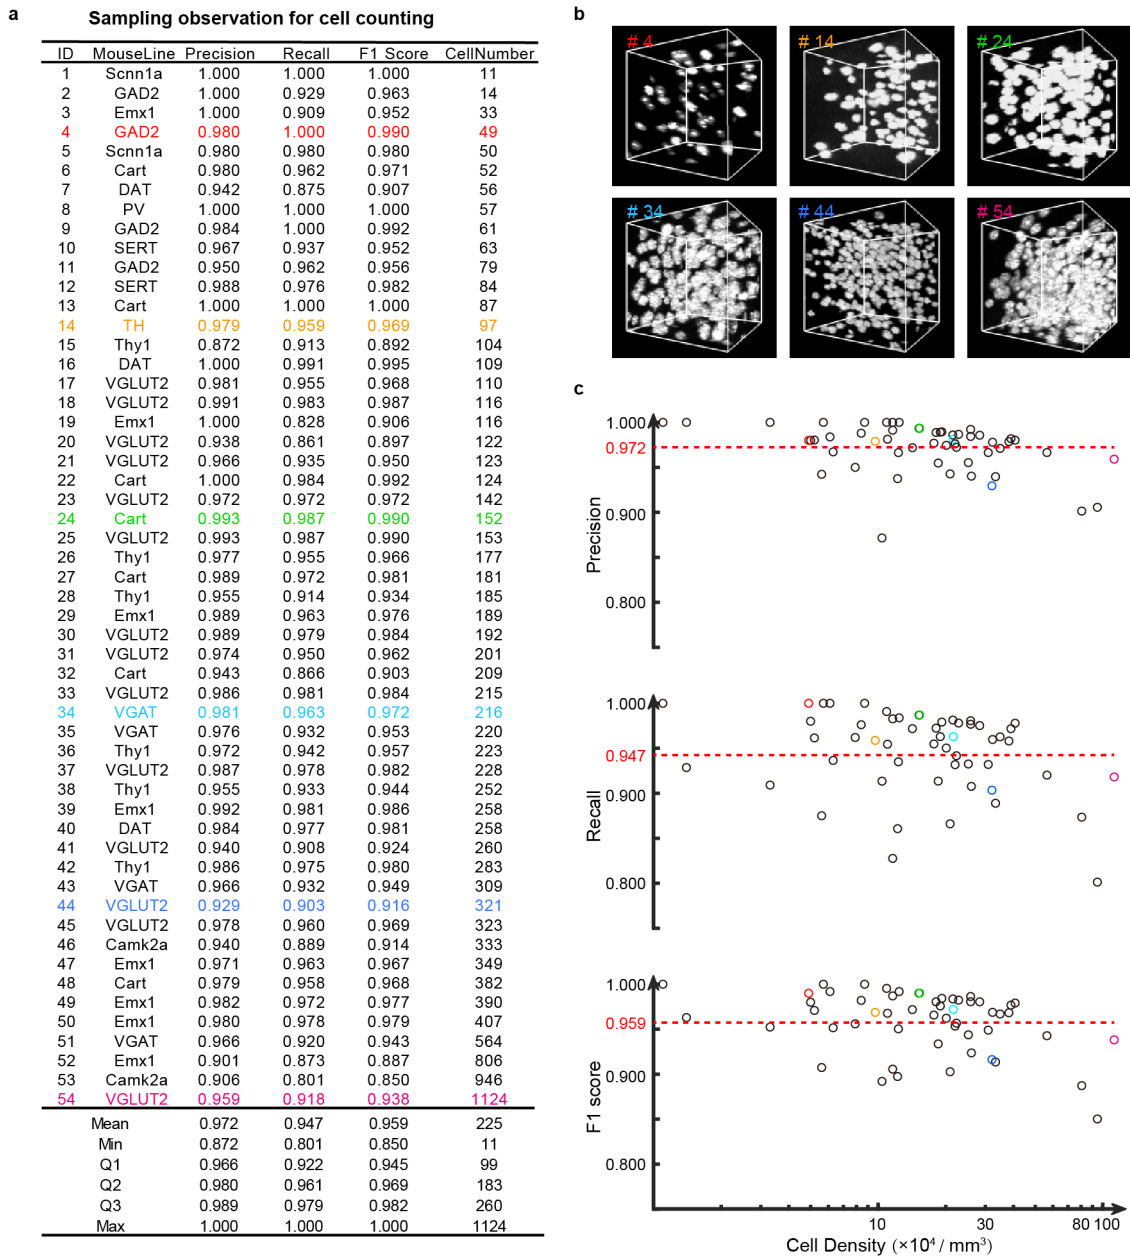

**Supplementary Fig. 3 | Evaluation of automatic cell counting**

(a) Sampling observations for cell counting. A total of 54 three-dimensional image blocks, each measuring  $100\ \mu\text{m} \times 100\ \mu\text{m} \times 100\ \mu\text{m}$ , were analyzed and arranged in ascending order based on their cell counts. The mean, minimum, first quartile (Q1), median (Q2), third quartile (Q3), and maximum values of precision, recall, F1 score, and cell counts are displayed. Samples are color-coded according to neuronal density.

(b) Representative image blocks with varying cell densities corresponding to the selected samples in (a). The Sample ID for each block is shown in the top-left corner.

(c) Visualization of precision, recall, and F1 scores for the data blocks in (a) across different cell densities. Red dashed lines indicate the mean values for each evaluation metric. Colored circles represent evaluation data corresponding to the blocks shown in (b).

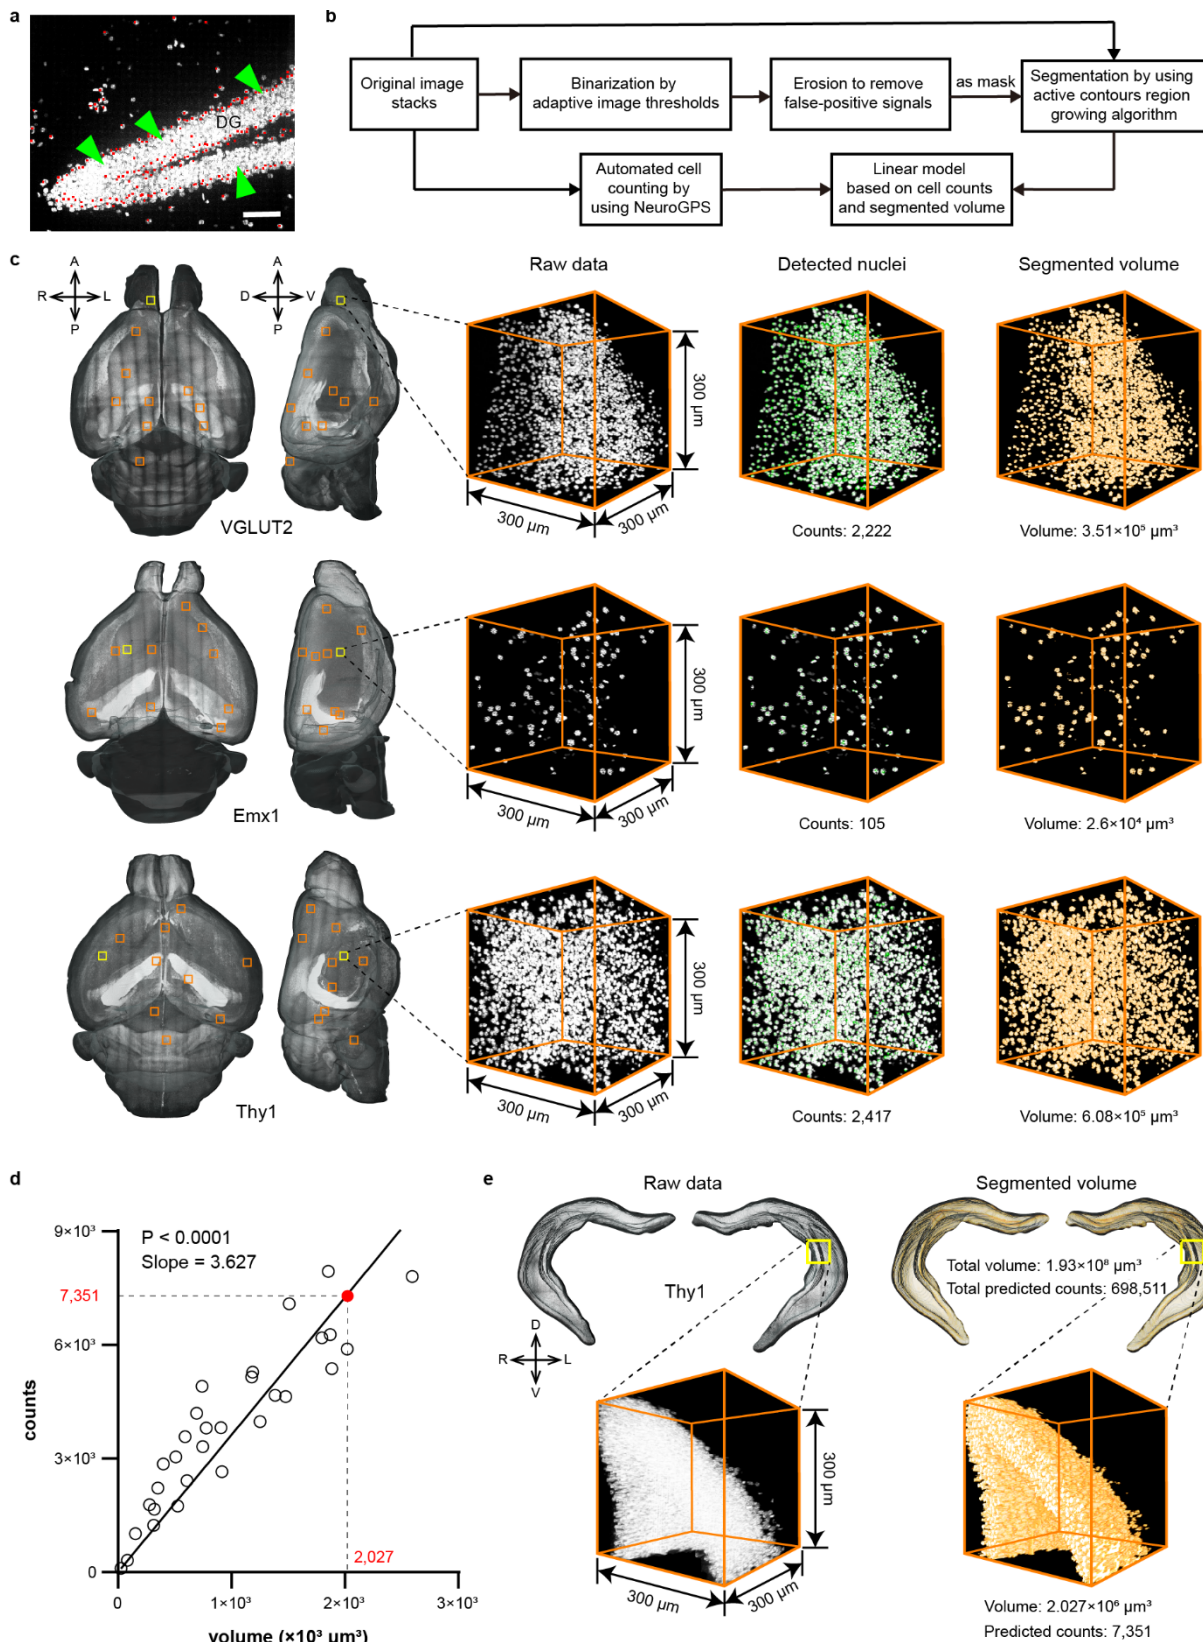

**Supplementary Fig. 4 | Estimating the number of nuclei in the DG**

(a) Automatic detection of Thy1<sup>+</sup> nuclei (red dots) in the DG using NeuroGPS. Green arrows indicate regions with nuclei densities too high to be automatically detected. The image represents a maximum intensity projection along the z-axis with a thickness of 20  $\mu\text{m}$ .

(b) Flowchart illustrating the development of a linear model to estimate the number of nuclei in



regions with extremely high densities.

(c) 3D visualization of whole-brain datasets showing regions with extremely dense nuclei in the DG (first column) and representative data blocks from other brain regions. The second column shows raw data, the third column displays detected nuclei, and the fourth column presents the segmented volume for regions with relatively less dense nuclei that can be automatically detected.

(d) Linear model for estimating the number of nuclei in data blocks with known volumes. The red dot represents the data block shown in (e).

(e) 3D visualization of Thy1<sup>+</sup> nuclei in the DG. The left panel shows raw data, while the right panel displays a representative data block and its corresponding segmented volume. Predicted counts of Thy1<sup>+</sup> nuclei in the DG and the selected block are indicated below the images.

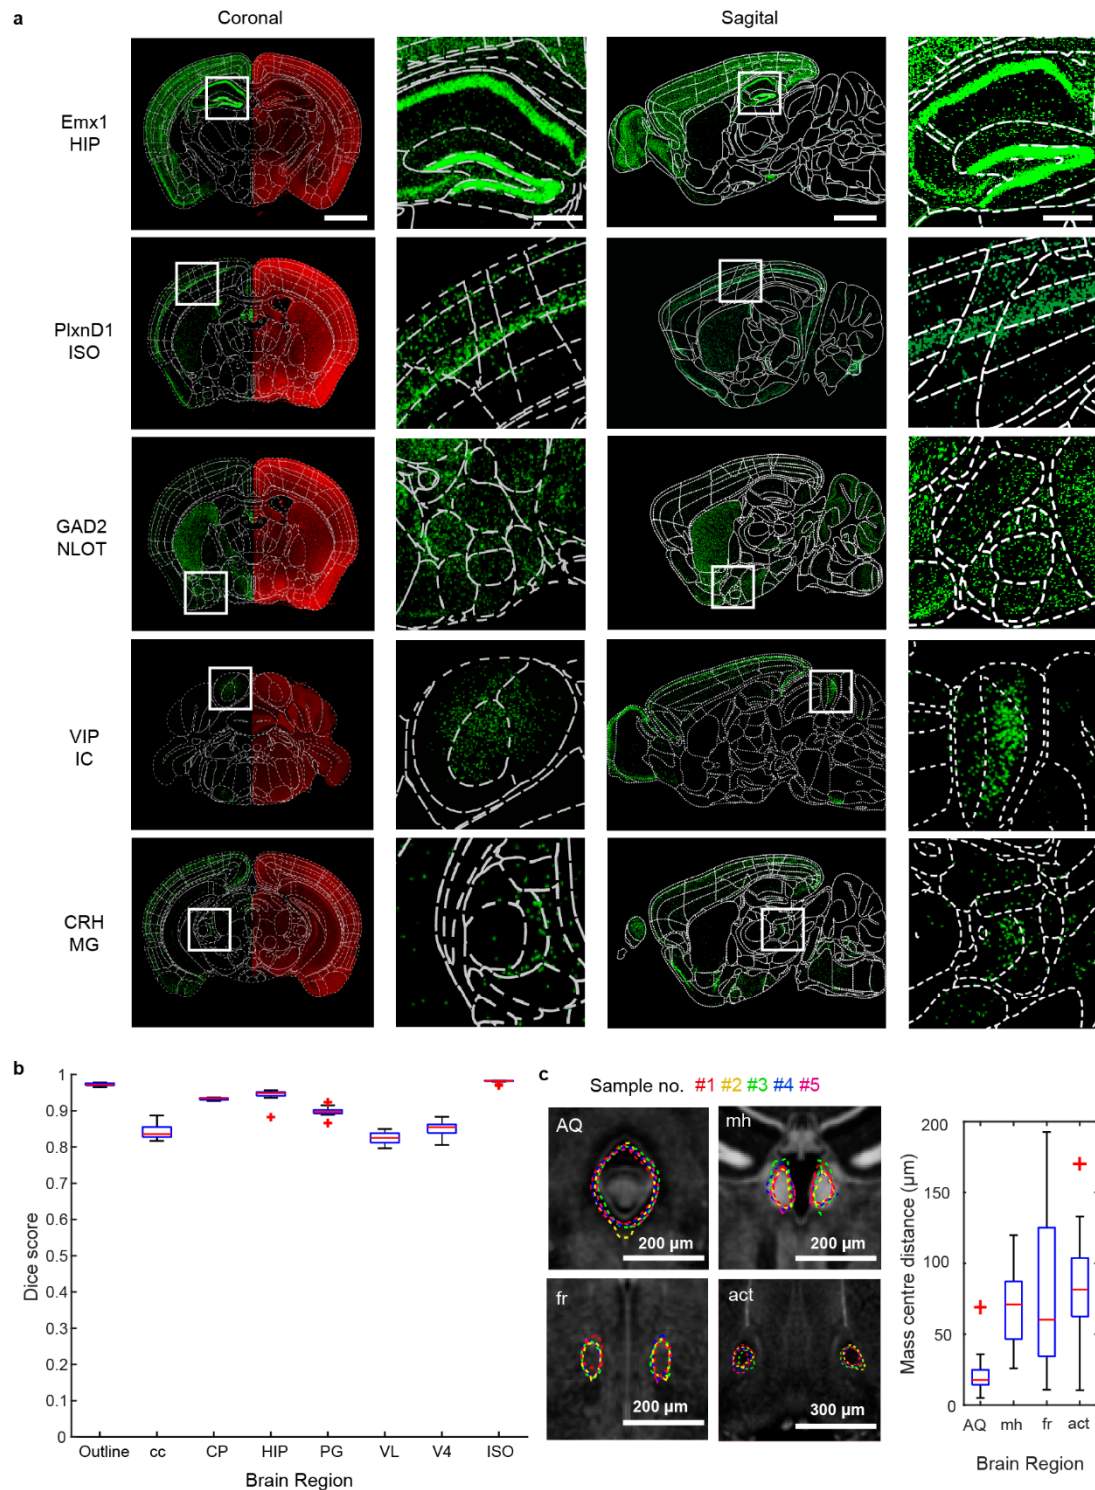

### Supplementary Fig. 5 | Evaluation of whole-brain registration

(a) Representative coronal and sagittal slices from registered datasets, with white dashed lines indicating anatomical borders defined by CCFv3. The brain regions selected for magnified views are shown on the left. Images are presented as maximum intensity projections along the z-axis with a thickness of 10  $\mu\text{m}$ . Scale bars, 2 mm for coronal and sagittal slices; 500  $\mu\text{m}$  for magnified views.

(b) Registration accuracy across different brain regions evaluated using Dice scores.

(c) Nuclei-level evaluation of registration accuracy. The outlines (dashed lines) of registered nuclei



from different samples (represented by different colors) are overlaid on coronal images of the CCFv3 averaged mouse brain. The boxplot (right) shows the distances between the mass centers of registered nuclei and their corresponding nuclei in CCFv3.

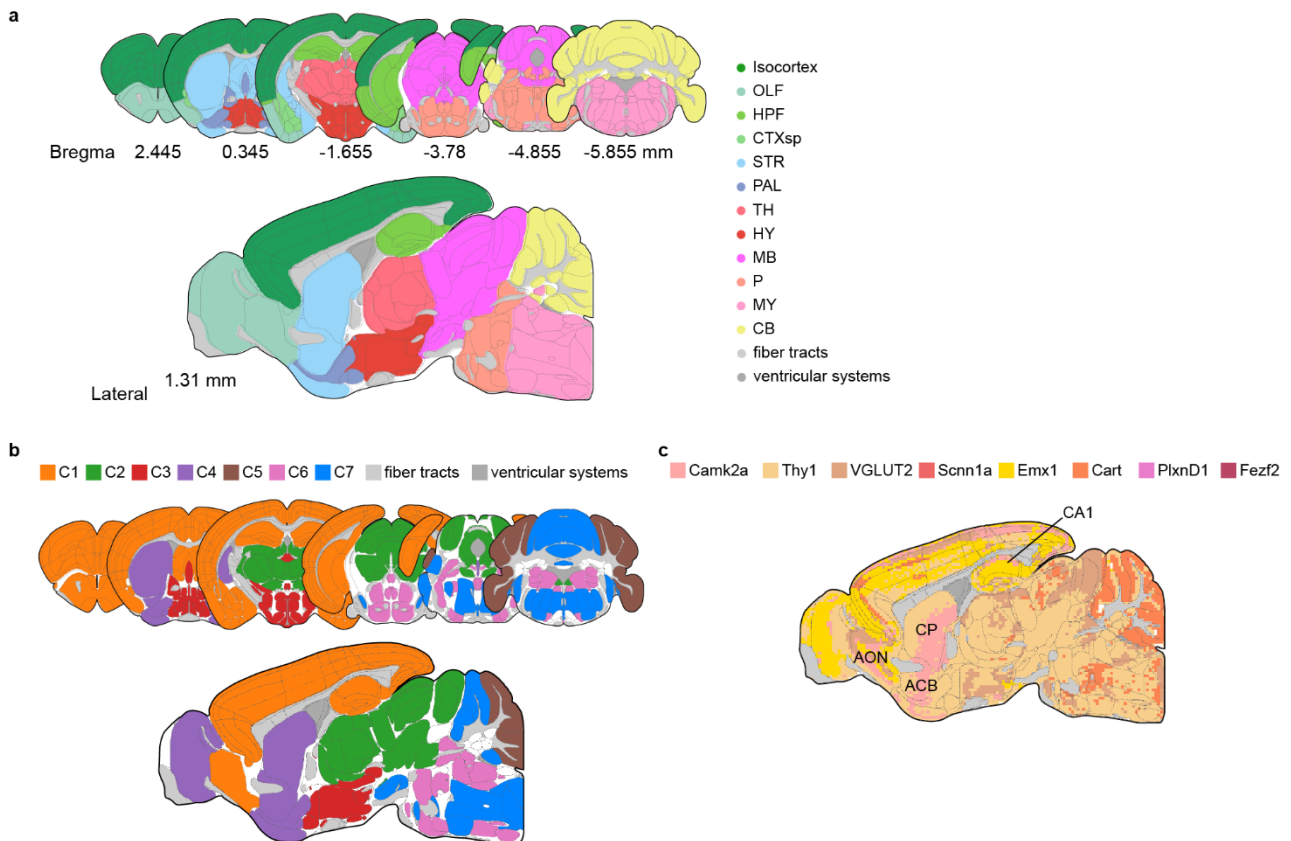

### Supplementary Fig. 6 | Spatial organization patterns of 8 types of glutamatergic neurons

(a) Coronal slices (top) and a sagittal slice (bottom) with anatomical boundaries of brain regions adapted from CCFv3. The distances from Bregma for each coronal slice and from the midline for the sagittal slice are indicated below, with all dimensions in millimeters.

(b) Mapping of 134 clustered anatomical regions onto the CCFv3. Clustering is based on the density distributions of 8 types of glutamatergic neurons across brain regions.

(c) Cubic density analysis of the 8 glutamatergic neuron types. Each cube is assigned a type corresponding to the neuron type with the highest density within it.



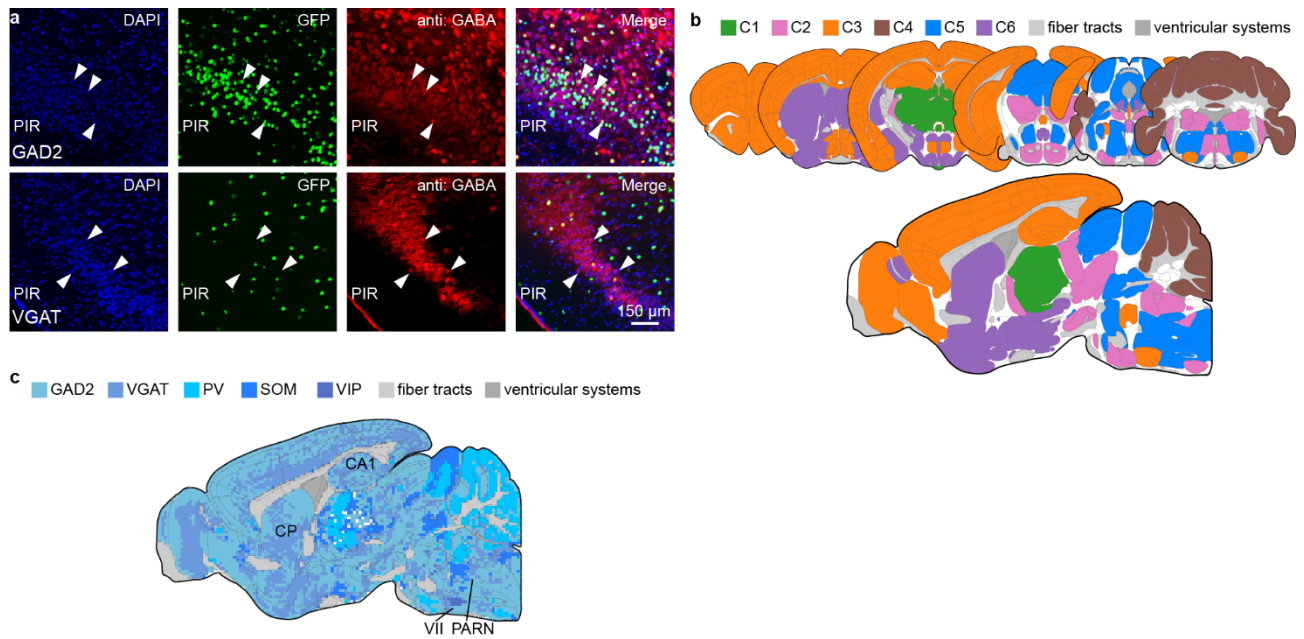

### Supplementary Fig. 7 | Spatial organization patterns of 5 types of GABAergic neurons

(a) Immunohistochemical staining of the piriform cortex (PIR) in GAD2-Cre;LSL-H2B-GFP (top) and VGAT-Cre;LSL-H2B-GFP (bottom) mice. Scale bar, 150  $\mu$ m.

(b) Mapping of 134 clustered anatomical regions onto CCFv3. Clustering is based on the density distributions of 5 types of GABAergic neurons across brain regions.

(c) Cubic density analysis of the 5 GABAergic neuron types. Each cube is assigned a type corresponding to the neuron type with the highest density within it.

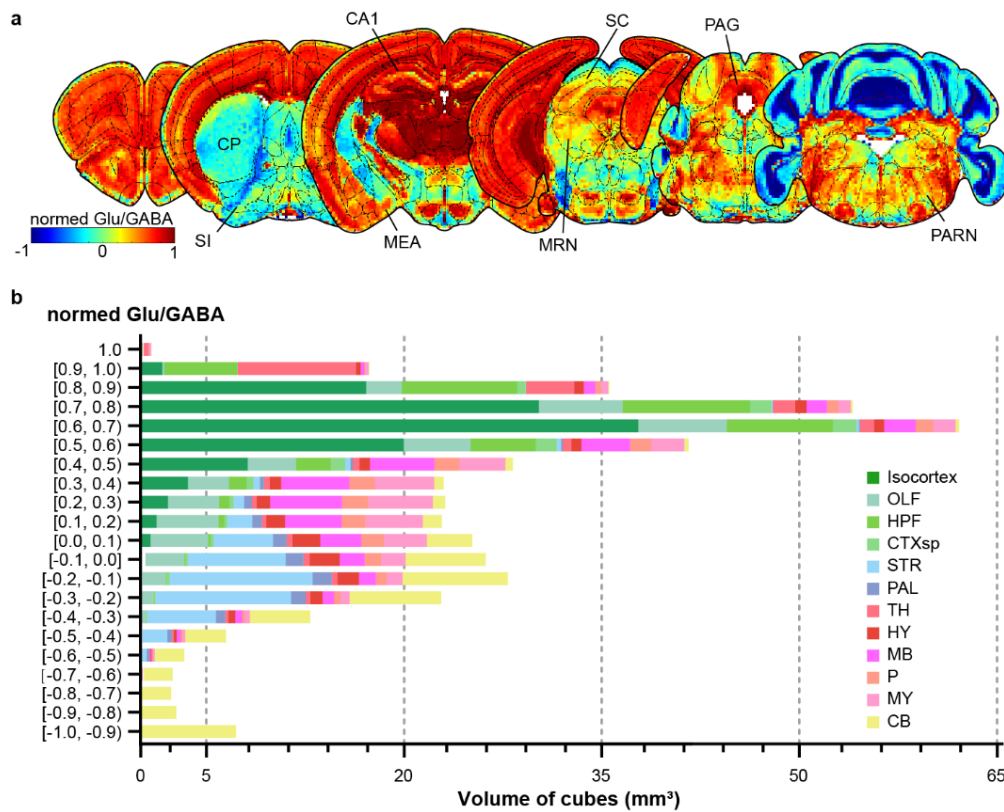

**Supplementary Fig. 8 | Cubic normed Glu/GABA in the whole mouse brain**

(a) Coronal heatmaps showing the distribution of the normed Glu/GABA ratio across the entire mouse brain, based on cubic normed Glu/GABA ratio analysis at a resolution of  $100\ \mu\text{m} \times 100\ \mu\text{m} \times 100\ \mu\text{m}$ .

(b) Volume of cubes within each range of normed Glu/GABA ratios. Colors represent the 12 brain regions to which the cubes belong.



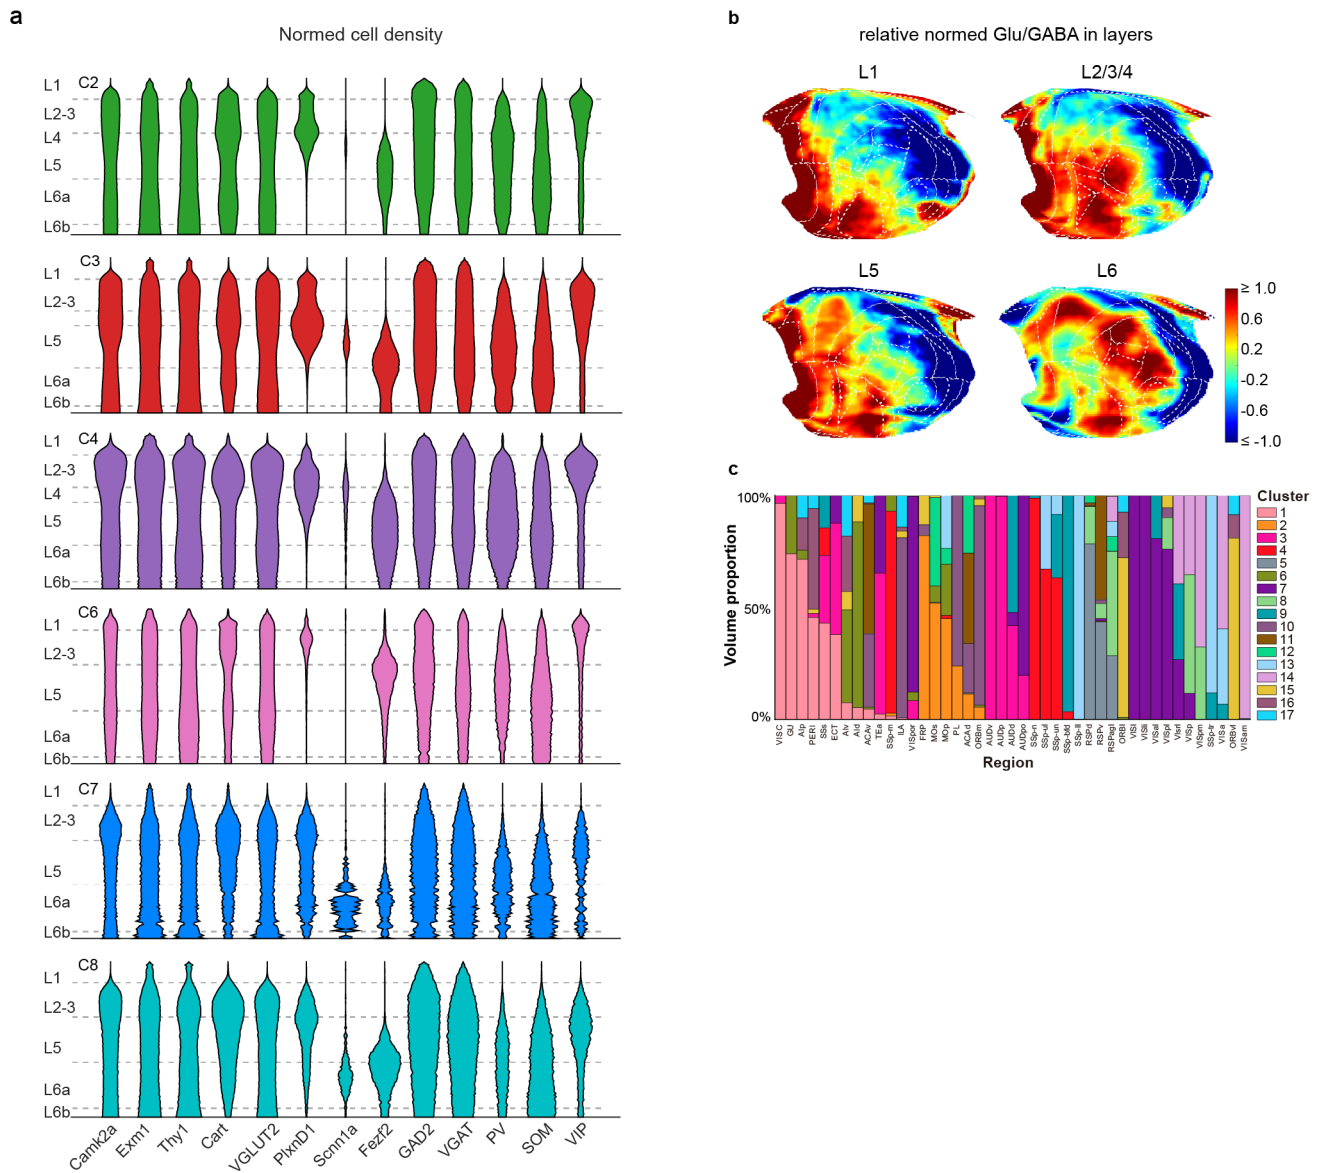

### Supplementary Fig. 9 | Molecularly defined modules in the isocortex

- (a) Normalized density of 13 neuron types across cortical depth (right) for clusters C2, C3, C4, C6, C7, and C8 shown in Fig. 4a. The density at each cortical column location is calculated as the logarithm of the mean density across all brain regions within each cluster, followed by type-specific normalization.
- (b) Heatmaps displaying the relative normalized Glu/GABA ratio in cortical layers 1, 2/3/4, 5, and 6 in a flatmap view.
- (c) Volume proportions of 17 clusters across 43 isocortical brain regions.

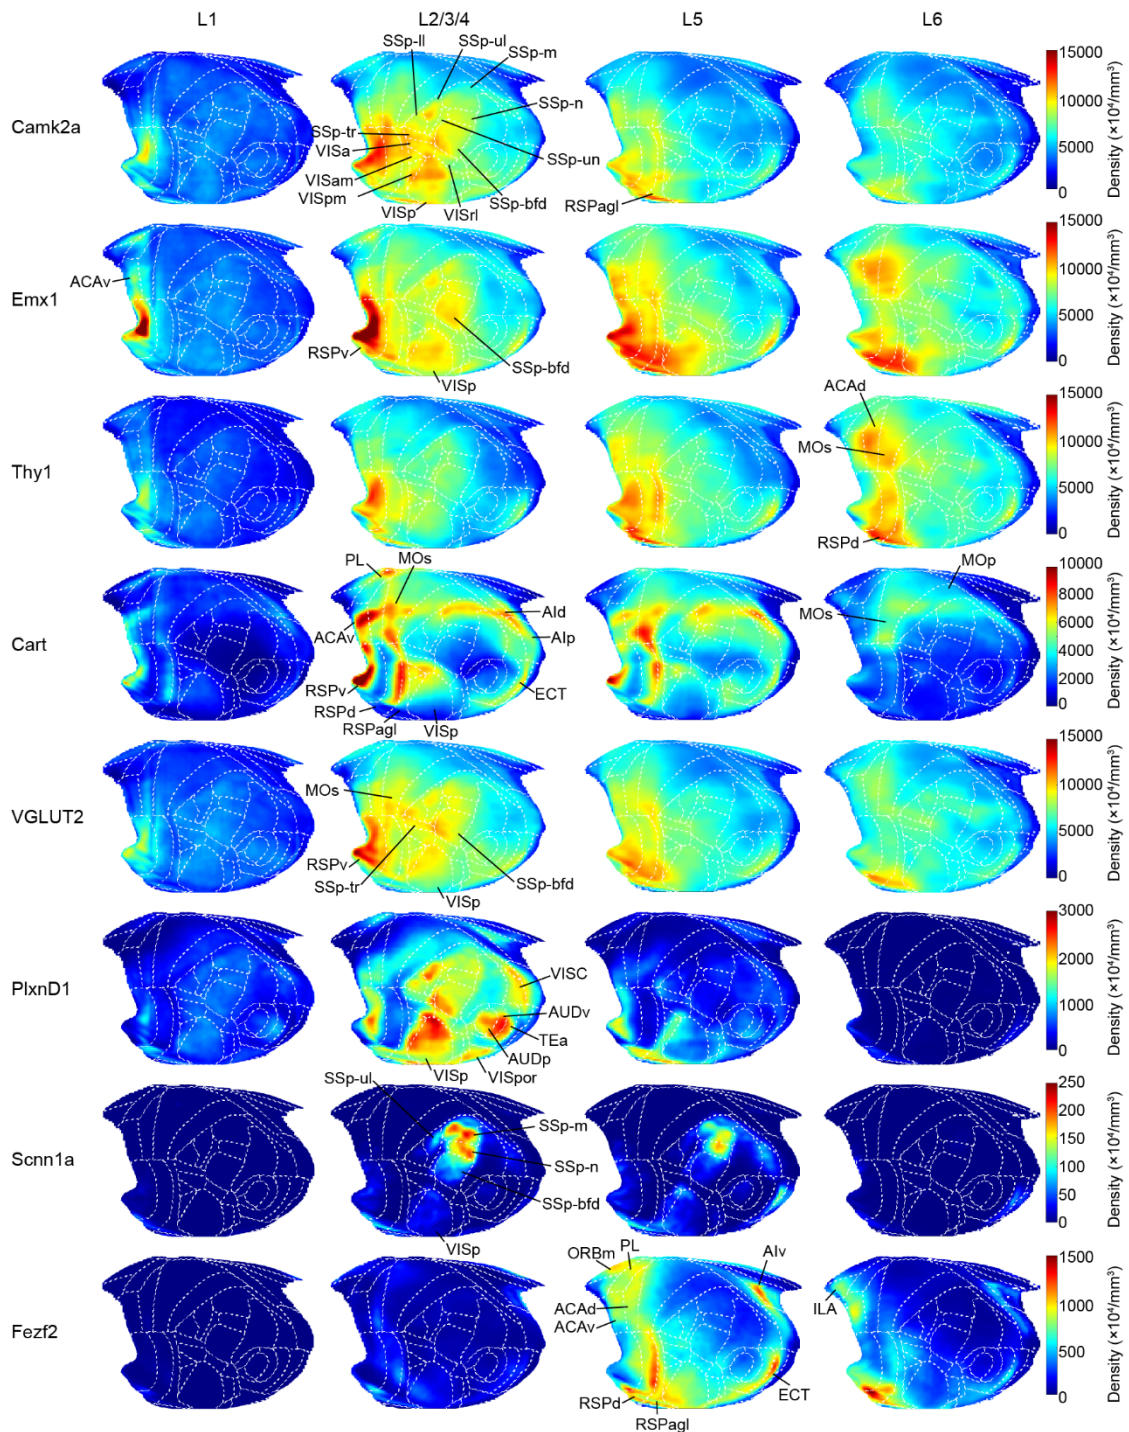

**Supplementary Fig. 10 | Density distribution of 8 glutamatergic neuron types in the isocortex**

Heatmaps showing the density distribution of 8 types of glutamatergic neurons in the isocortex, visualized in a flatmap view. Distinct colorbars are applied to each neuron type for enhanced visualization.



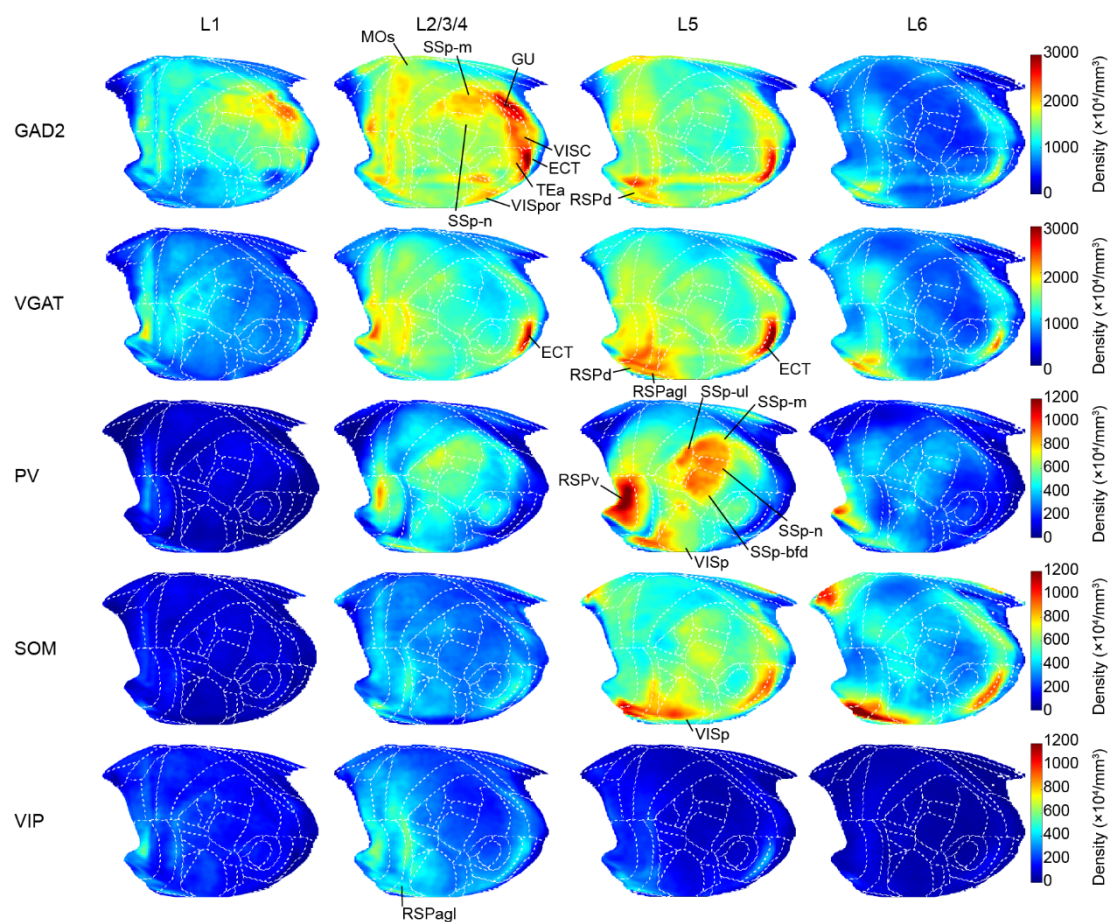

**Supplementary Fig. 11 | Density distribution of 5 GABAergic neuron types in the isocortex**

Heatmaps showing the density distribution of 5 types of GABAergic neurons in the isocortex, visualized in a flatmap view. Distinct colorbars are applied to each neuron type for enhanced visualization.

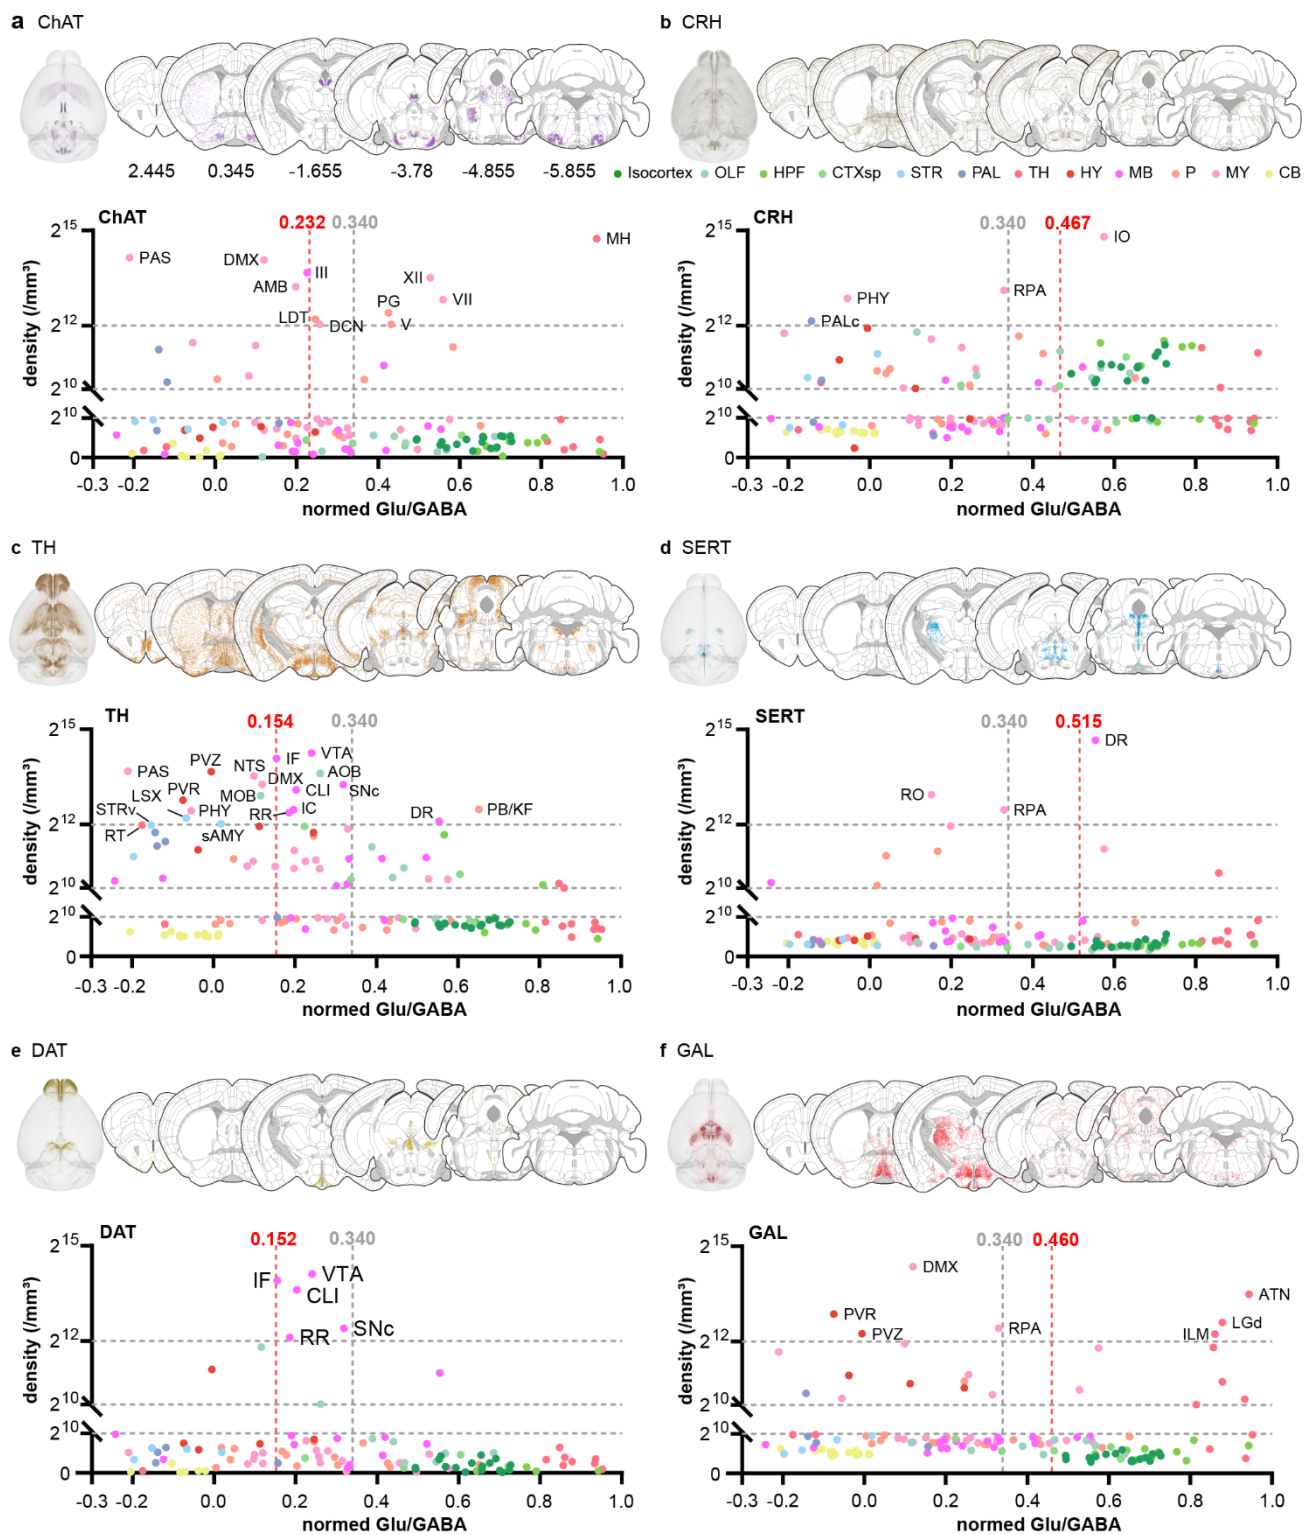

**Supplementary Fig. 12 | Spatial distributions of modulatory neurons and their relationships with normed Glu/GABA in 134 brain regions**

(a-f) Upper: 3D views and representative coronal slices showing the whole-brain distribution of 6 types of modulatory neurons. Distances from bregma for each coronal slice are indicated below, with all dimensions in millimeters. Lower: The relationship between the densities of each type of modulatory neuron and normed Glu/GABA across 134 brain regions. The grey dashed lines represent

the mean values of normed Glu/GABA in these regions, while the red dashed lines indicate the Modulatory normed Glu/GABA (Methods) for each type of neuron.



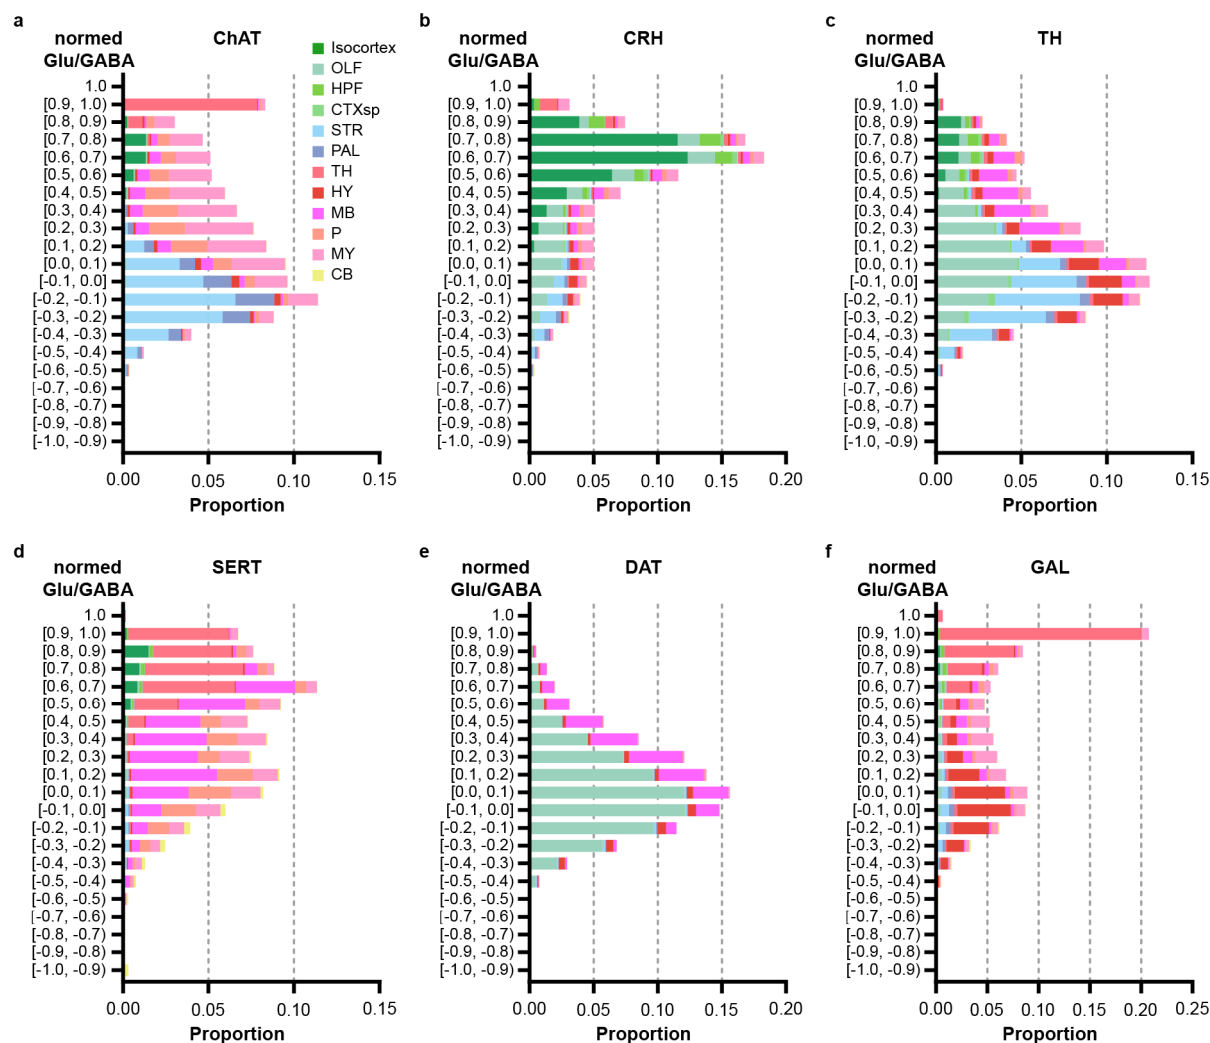

**Supplementary Fig. 13 | Cubic analysis of the distribution of 6 types of modulatory neurons vs. normed Glu/GABA**

(a-f) Cumulative proportions of neurons within each range of normed Glu/GABA. Colors represent the 12 brain regions to which each cube belongs.

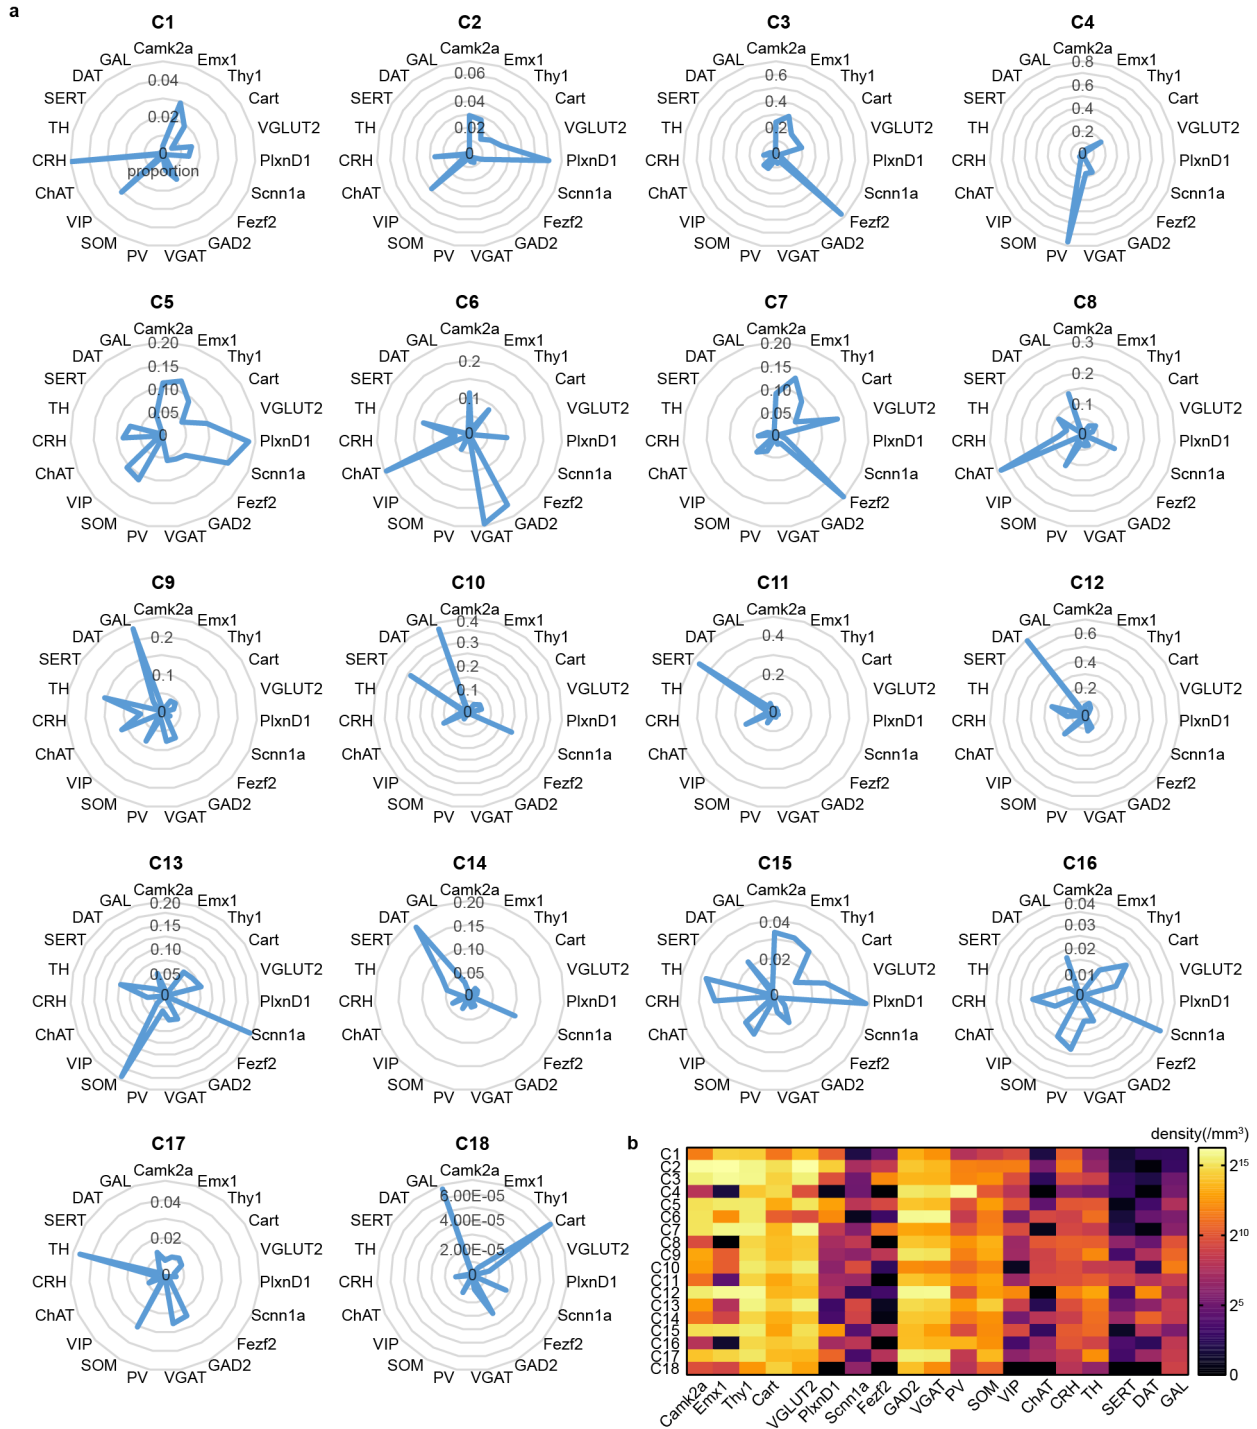

**Supplementary Fig. 14 | Relationships between the distribution of 19 types of neurons and the 18 clusters in the first clustering of the whole brain**

(a) Proportions of different neuron types across the 18 clusters.

(b) Heatmap of neuronal density for different neuron types within the 18 clusters.



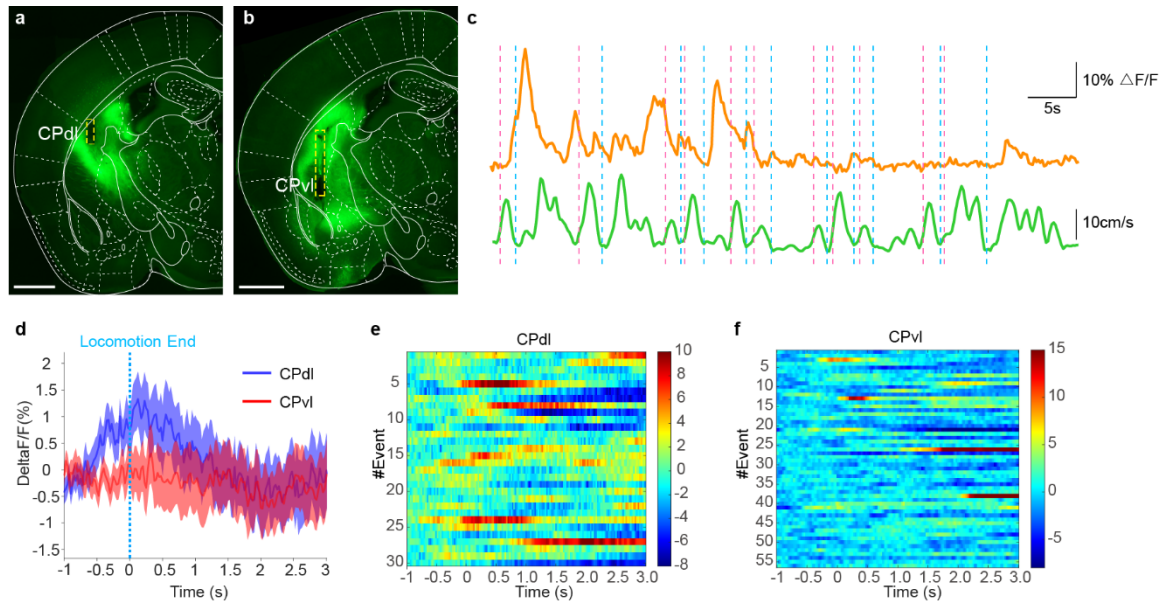

### Supplementary Fig. 16 | Functional experiments in CPdl and CPvl

(a-b) Representative images showing the virus injection sites and the position of the optical fiber for CPdl and CPvl, respectively. Scale bar, 1 mm.

(c) A representative trace of the transient calcium signal of glutamatergic neurons in CPdl (orange) and the corresponding mouse speed (green).

(d) Average plots from individual animals showing differential calcium response activity of glutamatergic neurons in CPdl and CPvl during locomotion end events.

(e-f) Heatmaps of calcium transients in glutamatergic neurons during locomotion end events in CPdl (e) and CPvl (f), respectively.



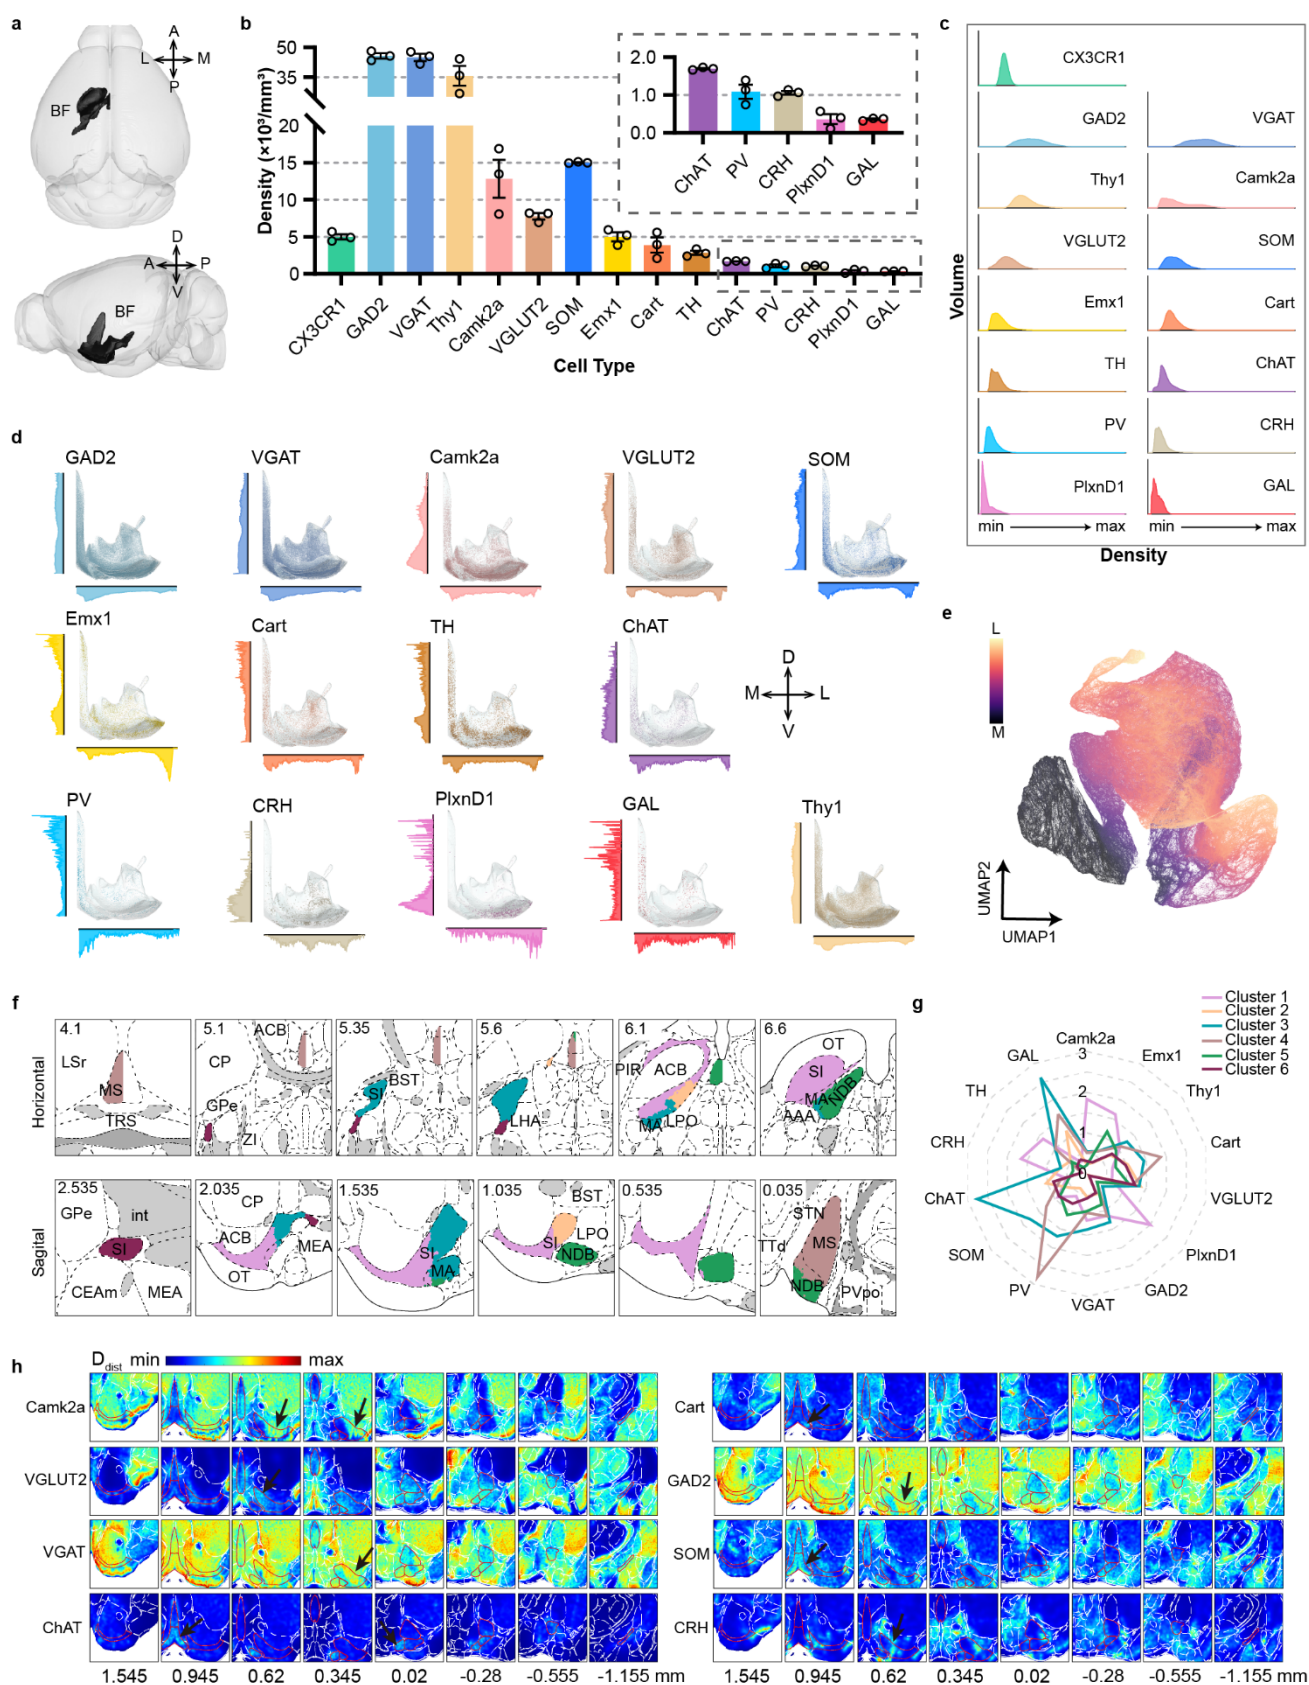

**Supplementary Fig. 17 | Molecularly defined subregions in BF**

(a) Spatial location of the BF in the mouse brain.

(b) Quantification of different types of cells in the BF.

(c) Distribution of volume and density of different cell types in the BF.

- (d) 3D views of 13 types of neurons in the BF, with their density distributions along the AP and ML axes shown on the left and below for each type, respectively.
- (e) UMAP representation of all data cubes in the BF, colored by their positions along the AP axis.
- (f) Horizontal (upper) and sagittal (lower) views of subregions in the BF, colored by clusters and their adjacent brain regions. Distances from the top of the brain and the midline are shown in the upper left.
- (g) Radar chart of clusters and cell density distribution in the BF. The density in each cluster is normalized by dividing by the average density in the BF for each cell type.
- (h) Heatmap of neuronal density for different cell types in the BF. Discriminative distributions are indicated by arrows. Distances from Bregma are shown below.

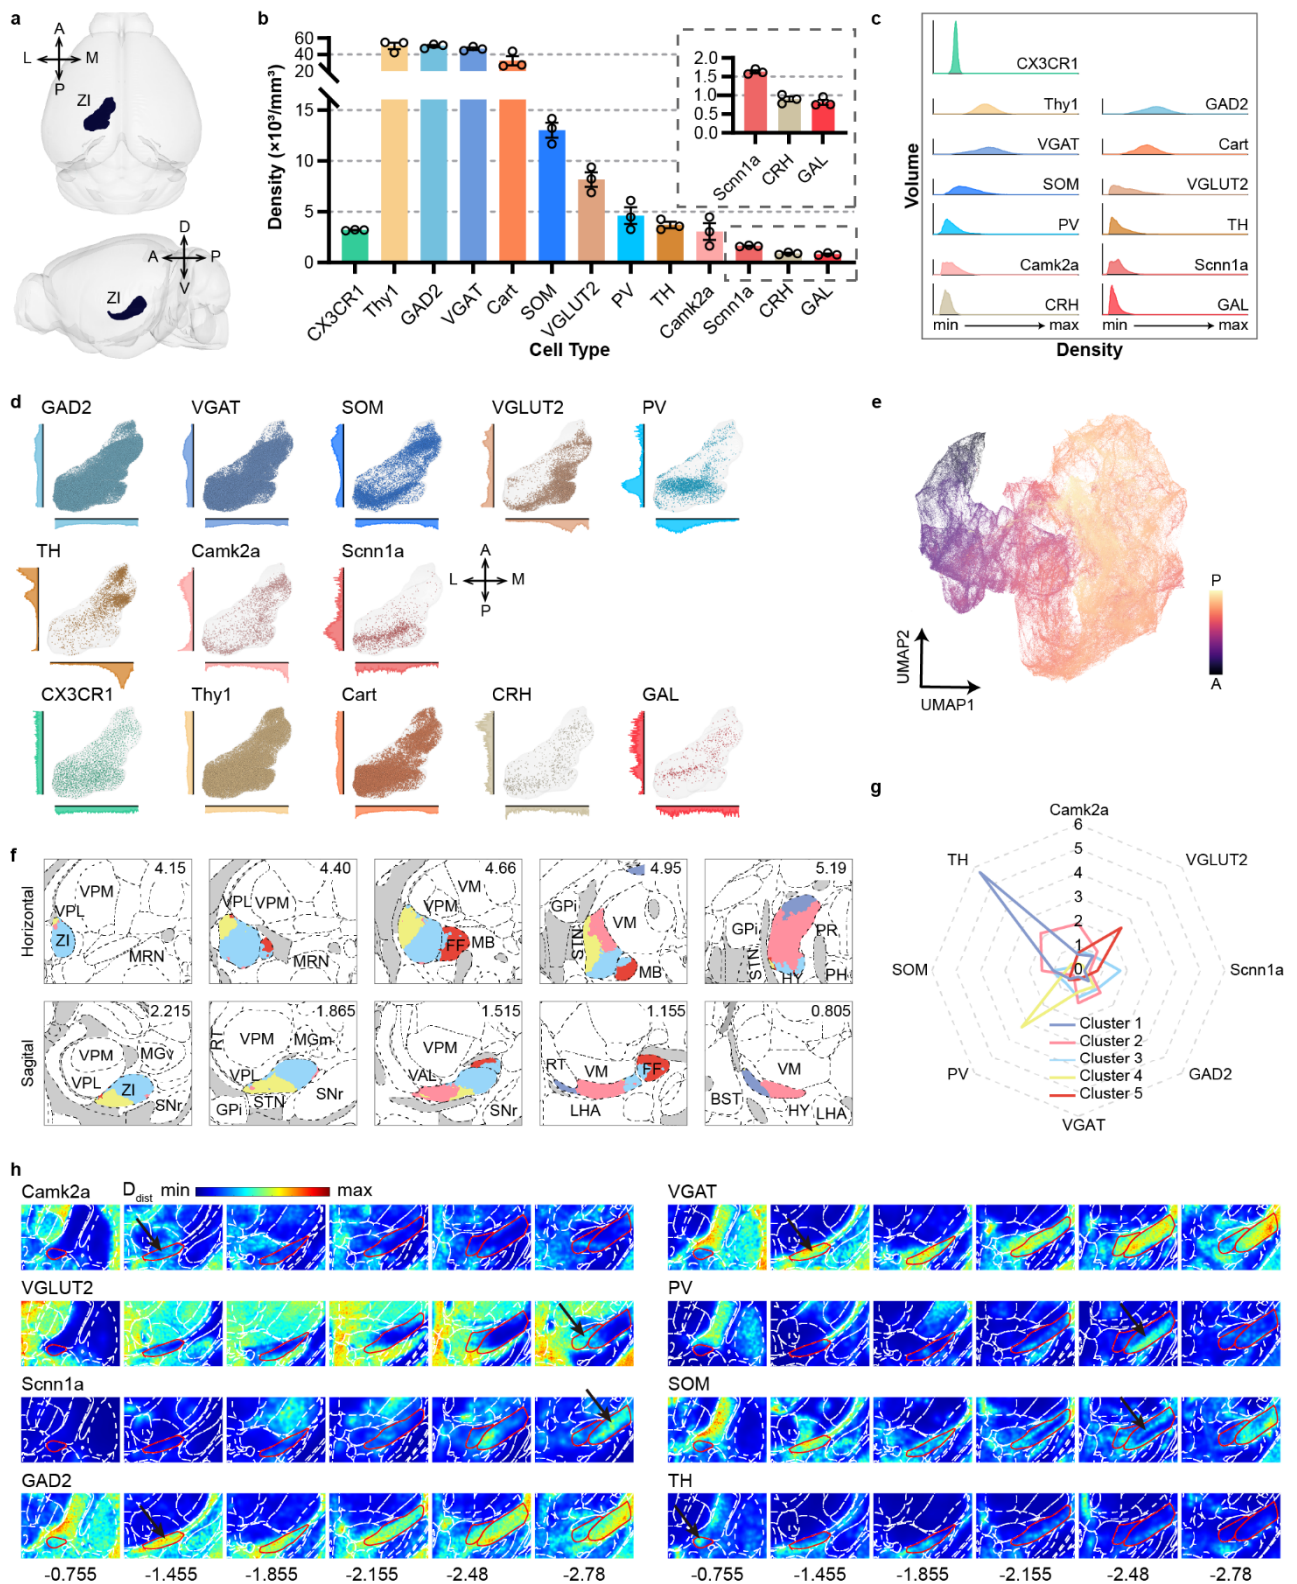

**Supplementary Fig. 18 | Molecularly defined subregions in ZI**

- (a) Spatial location of the ZI in the mouse brain.
- (b) Quantification of different types of cells in the ZI.
- (c) Distribution of volume and density of different cell types in the ZI.
- (d) 3D views of 13 types of neurons in the ZI, with their density distributions along the AP and ML axes shown on the left and below for each type, respectively.

- (e) UMAP representation of all data cubes in the ZI, colored by their positions along the AP axis.
- (f) Horizontal (upper) and sagittal (lower) views of subregions in the ZI, colored by clusters and their adjacent brain regions. Distances from the top of the brain and the midline are shown in the upper right.
- (g) Radar chart of clusters and cell density distribution in the ZI. The density in each cluster is normalized by dividing by the average density in the ZI for each cell type.
- (h) Coronal heatmap of neuronal density for different cell types in the ZI. Discriminative distributions are indicated by arrows. Distances from Bregma are shown below.



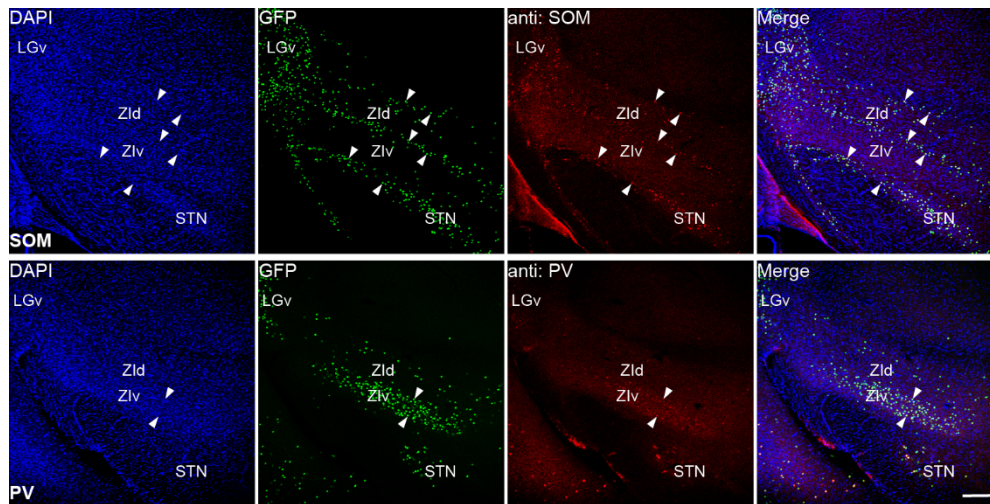

**Supplementary Fig. 19 | IHC validation of SOM (upper) and PV (lower) neurons in ZI**

Immunohistochemical staining of SOM-Cre;*LSL-H2B-GFP* (upper) and PV-Cre;*LSL-H2B-GFP* (lower) mice in the ZI. Scale bars, 200  $\mu$ m.

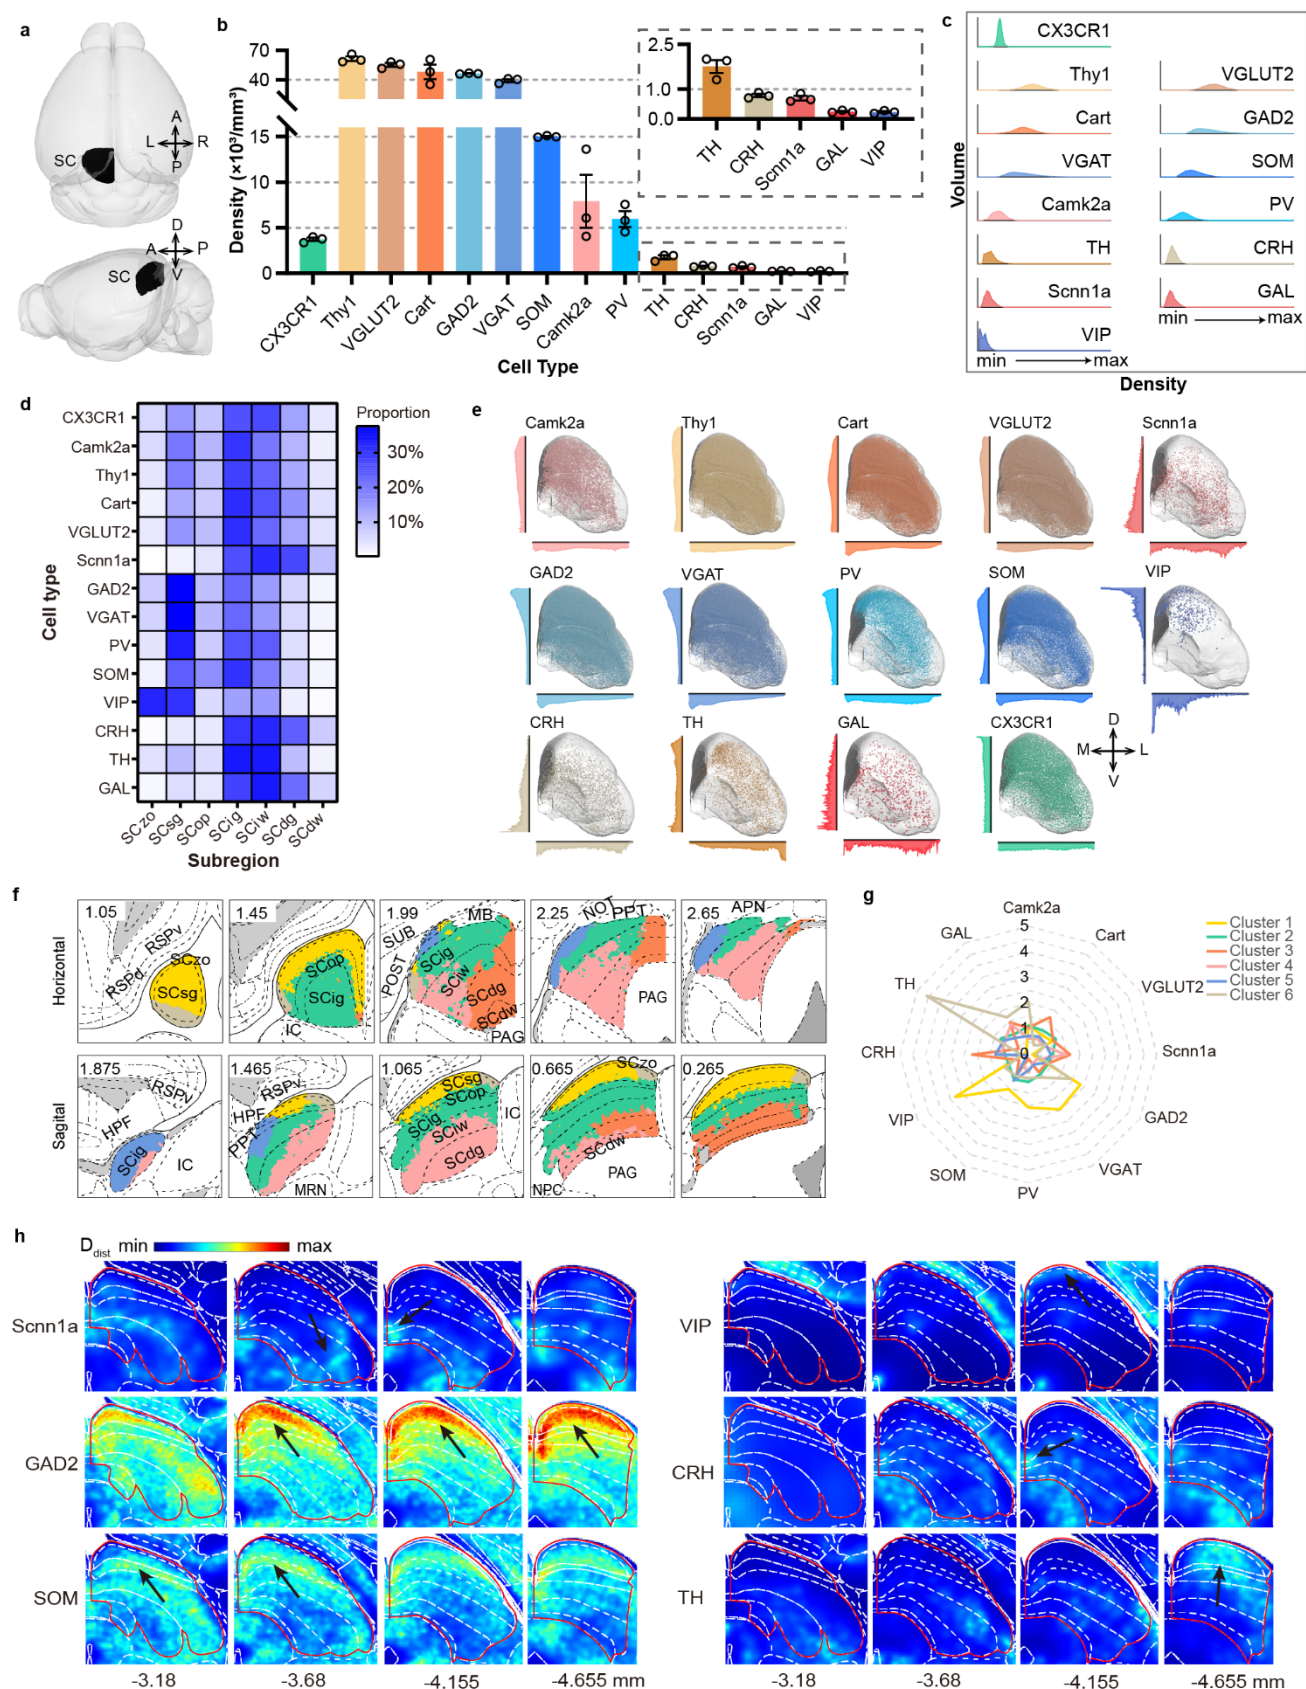

**Supplementary Fig. 20 | Molecularly defined subregions in SC**

(a) Spatial location of the SC in the mouse brain.

(b) Quantification of different types of cells in the SC.

(c) Distribution of volume with the density of different cell types in the SC.

- (d) Proportional distribution of 13 neuron types across seven subregions of the SC.
- (e) 3D views of 13 types of neurons in the SC and their density distributions along the AP and ML axes, shown on the left and below for each type.
- (f) Horizontal (upper) and sagittal (lower) views of subregions in the SC, colored by clusters, along with their adjacent brain regions. Distances from the top of the brain and the midline are shown in the upper left.
- (g) Radar chart illustrating cluster distribution and cell density in the SC. The density in each cluster is normalized by dividing by the average density in the SC for each cell type.
- (h) Coronal heat map of neuronal density for different types in the SC. Distinctive distributions are indicated by arrows. Distances from Bregma are shown below.



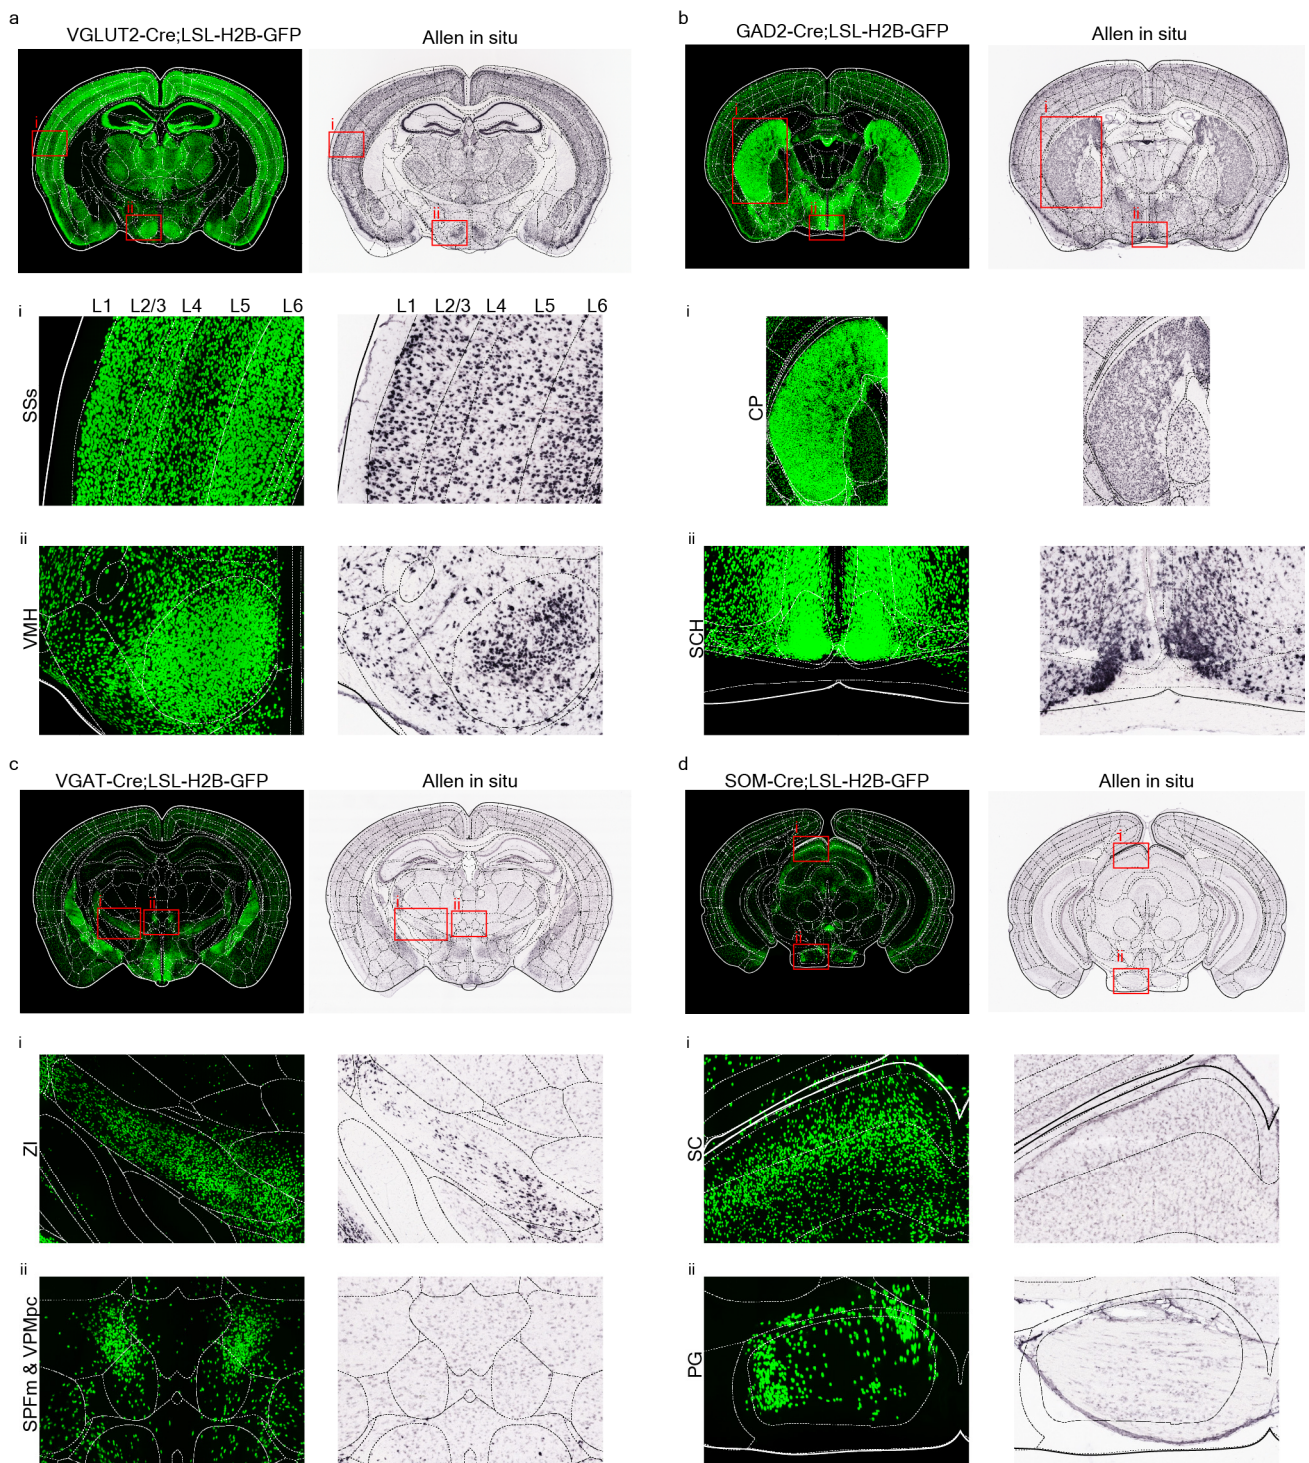

**Supplementary Fig. 21 | fMOST data in comparison to Allen Brain In Situ Hybridization Data**

(a) The density of VGLUT2<sup>+</sup> cells detected by fMOST imaging of VGLUT2-Cre<sup>+</sup> cells (first column of panels) is comparable to that detected by Allen in situ hybridization (second column of panels). The second row shows the density across layers of the supplemental somatosensory area (SSs), and the third row highlights the high density in the VMH region.

(b) The density of GAD2<sup>+</sup> cells detected by fMOST imaging of GAD2-Cre<sup>+</sup> cells (first column of panels) is comparable to that detected by Allen in situ hybridization (second column of panels). The second row illustrates the cell density in the CP, revealing density differences between the dorsal and ventral



areas, and the third row highlights the high density in the suprachiasmatic nucleus (SCH) region.

(c) The density of VGAT<sup>+</sup> cells reveals both similarities and differences when compared between fMOST imaging of VGAT<sup>2+</sup> cells (first column of panels) and Allen in situ hybridization (second column of panels). The second row shows similar densities in the ZI, while the third row highlights density differences in the magnocellular part of subparafascicular nucleus (SPFm) and parvicellular part of ventral posteromedial nucleus of the thalamus (VPMpc).

(d) The density of SOM<sup>+</sup> cells detected by fMOST imaging of SOM<sup>+</sup> cells (first column of panels) differs from that detected by Allen in situ hybridization (second column of panels). The second row illustrates density differences in the SC, and the third row shows differences in the PG.

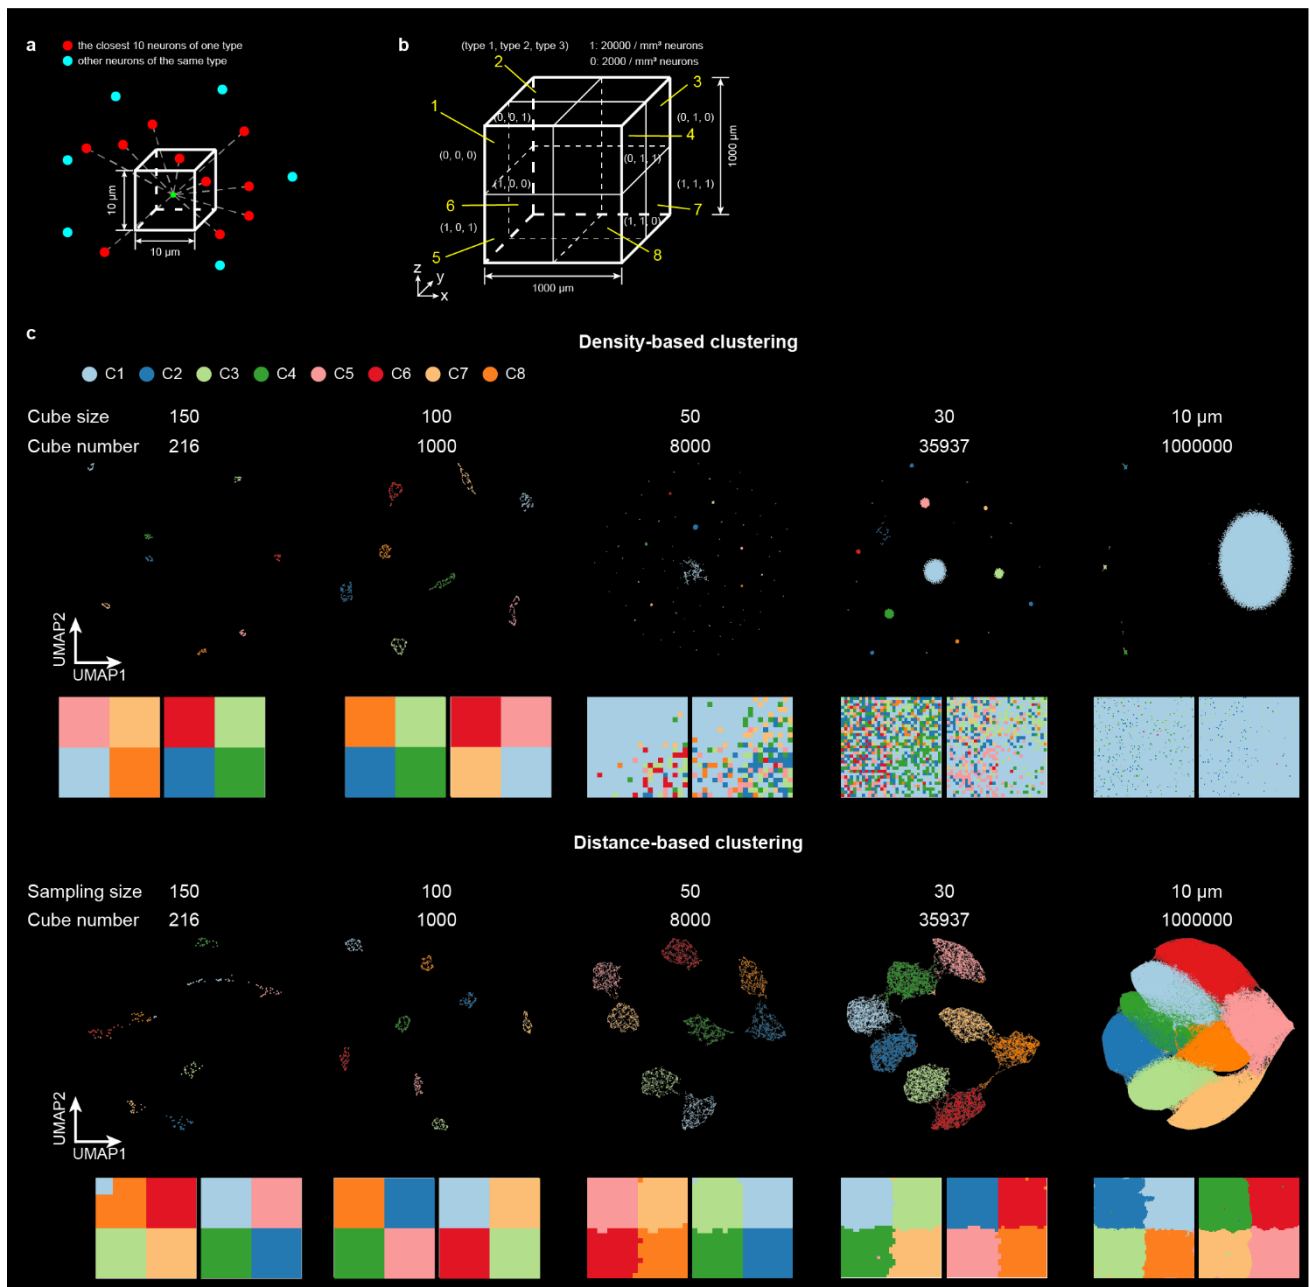

**Supplementary Fig. 22 | Comparison of density-based and distance-based clustering**

(a) The average distance from the 10 neurons nearby to the center of the cube ( $10\ \mu\text{m} \times 10\ \mu\text{m} \times 10\ \mu\text{m}$ ) is used to describe local distribution of neurons for each type. Red dots indicate the closest 10 neurons to the center of the cube (the green dot) of one type. Cyan dots indicate other neurons of the same type.

(b) A schematic diagram of a three-dimensional (3D) model of the distribution of neurons, which is a cube with a side length of  $1000\ \mu\text{m}$ . We assume that there are three different types of neurons, each with two distribution patterns of different densities ( $20000\ /\ \text{mm}^3$  and  $2000\ /\ \text{mm}^3$ ) in different regions of the 3D model. The whole model is divided into 8 equally large regions ( $500\ \mu\text{m} \times 500\ \mu\text{m} \times 500\ \mu\text{m}$  for each) with different neuron composition patterns. In each divided region, each type of neuron is randomly distributed in space with a corresponding density.

(c) UMAP representations and representative parallel sections of the 3D model colored by clusters (Methods) with different cube sizes (150  $\mu\text{m}$ , 100  $\mu\text{m}$ , 50  $\mu\text{m}$ , 30  $\mu\text{m}$ , 10  $\mu\text{m}$  indicates the length of side of each cube) of neuronal density data and different sampling sizes (sampling points are taken every 150  $\mu\text{m}$ , 100  $\mu\text{m}$ , 50  $\mu\text{m}$ , 30  $\mu\text{m}$ , 10  $\mu\text{m}$  for three orthogonal directions) of neuronal distance data. The number of cubes in each case is shown at the top of the UMAP.
